# Supplementary material for: Cellular compartmentalisation and receptor promiscuity as a strategy for accurate and robust inference of position during morphogenesis
Source: eLife. 2023 Mar 6;12:e79257. doi: 10.7554/eLife.79257 (PMC9988261; doi:10.7554/eLife.79257)
Supplement: Figure 14—figure supplement 1—source data 1. — Mean andstandard error of mean (SEM) for b,c. [file elife-79257-fig14-figsupp1-data1.xlsx]

## Sheet: Control-GFP channel
	Position
Curve Number	0	0.0344828	0.0689655	0.103448	0.137931	0.172414	0.206897	0.241379	0.275862	0.310345	0.344828	0.37931	0.413793	0.448276	0.482759	0.517241	0.551724	0.586207	0.62069	0.655172	0.689655	0.724138	0.758621	0.793103	0.827586	0.862069	0.896552	0.931034	0.965517	1
1	0.188622	0.191471	0.277021	0.213978	0.194273	0.127575	0.167794	0.183951	0.087573	0.0448254	0.03978	0.0350413	0.02451	0.0302945	0.0194581	0.0318979	0.0396278	0.0334375	0.0310847	0.0306173	0.0243518	0.0216776	0.0168985	0.0173938	0.0239733	0.0240533	0.0437686	0.0221716	0.00862974	0.00844544
2	0.26427	0.185104	0.144596	0.141268	0.186508	0.127711	0.164305	0.157992	0.0890725	0.0556106	0.0574489	0.0438682	0.0296406	0.0472132	0.0392338	0.0279229	0.0349676	0.0425357	0.0543442	0.0287169	0.0207247	0.0307344	0.0222337	0.023365	0.0181003	0.027774	0.0185025	0.017199	0.00935765	0.00751587
3	0.198447	0.148995	0.146404	0.147839	0.179035	0.182038	0.169901	0.1605	0.0774277	0.101535	0.0752261	0.0561434	0.0352264	0.0312118	0.0345163	0.0289981	0.0325512	0.0369401	0.0403676	0.0380674	0.027579	0.0171387	0.0172097	0.0181523	0.0152621	0.0257255	0.0194853	0.0153104	0.0181818	0.027927
4	0.119318	0.127112	0.146016	0.176456	0.128562	0.118424	0.151879	0.199434	0.109349	0.0711525	0.0744102	0.0527351	0.0656034	0.0488662	0.0455181	0.0334416	0.0416006	0.0444389	0.0517452	0.0206356	0.0221363	0.0214345	0.0161482	0.0306601	0.0232108	0.0136397	0.0191894	0.0133399	0.0109078	0.0117745
5	0.237313	0.184625	0.179332	0.154621	0.141922	0.130877	0.169053	0.164497	0.128895	0.0846321	0.0779243	0.070728	0.083552	0.0463616	0.0326811	0.0484417	0.0357308	0.0361012	0.0221196	0.0238489	0.0250899	0.0222848	0.0252626	0.0219384	0.0325856	0.0262784	0.0105425	0.0113297	0.00802442	0.0169191
6	0.285832	0.151292	0.113296	0.158654	0.141468	0.138811	0.178137	0.118945	0.0908638	0.0799143	0.0595465	0.0856818	0.0694374	0.0446668	0.049805	0.0468672	0.0477891	0.0300381	0.0303431	0.026748	0.0248613	0.0217524	0.0187454	0.0300707	0.0247934	0.0235173	0.0113354	0.00994661	0.0127095	0.0124143
7	0.254071	0.234878	0.136346	0.144628	0.211763	0.154987	0.138828	0.137637	0.122044	0.0831856	0.0491673	0.0468512	0.0674538	0.0912819	0.0802442	0.0665969	0.0493293	0.0253307	0.0223343	0.0245255	0.0144808	0.0131987	0.0169321	0.0302859	0.0335708	0.0241452	0.0181167	0.00953592	0.00673401	0.010643
8	0.251388	0.170551	0.123583	0.13337	0.183146	0.240539	0.107932	0.0903597	0.113882	0.0833501	0.0514216	0.0457123	0.0650584	0.0610579	0.0557133	0.078563	0.0815147	0.0510485	0.039927	0.0270767	0.0296438	0.0219769	0.0243354	0.010244	0.0269317	0.0186193	0.0145518	0.00957124	0.00791195	0.00935765
9	0.200662	0.180377	0.191883	0.134357	0.179505	0.189935	0.108811	0.132231	0.170333	0.0945745	0.0498783	0.0553288	0.064946	0.0445419	0.0665995	0.0884711	0.089304	0.0605505	0.0838996	0.0643992	0.0257379	0.0216916	0.019636	0.0196844	0.0176092	0.0204486	0.0097636	0.00917883	0.0103916	0.0159308
10	0.203834	0.116905	0.1046	0.109882	0.138414	0.163758	0.17429	0.184346	0.116066	0.099858	0.0562942	0.0547501	0.0554307	0.0638504	0.0834194	0.043638	0.0568531	0.0569736	0.0528174	0.0422622	0.0329747	0.0215843	0.0203382	0.0396161	0.0261797	0.0170621	0.0112186	0.00718178	0.0147992	0.0109762
11	0.146802	0.138517	0.114858	0.133987	0.128173	0.17823	0.117338	0.138381	0.131054	0.0826241	0.071242	0.0573982	0.0562018	0.0420754	0.0420211	0.0656465	0.0252772	0.0406198	0.0418516	0.0528435	0.054033	0.041619	0.0243288	0.0297917	0.00695679	0.00653567	0.0118541	0.00860008	0.00911082	0.0171789
12	0.345125	0.157055	0.13629	0.120439	0.114963	0.145064	0.0915671	0.0874675	0.0970783	0.107757	0.0744598	0.0525892	0.048788	0.0521917	0.0584533	0.0565954	0.0507788	0.0319983	0.0459566	0.0421457	0.0346227	0.042009	0.020262	0.0113272	0.0114508	0.0182736	0.00848006	0.0134181	0.0123006	0.0206075
13	0.208211	0.127893	0.104404	0.121847	0.0995395	0.0856273	0.0872153	0.0786361	0.111095	0.101768	0.0757033	0.0638434	0.0528893	0.0392796	0.0246384	0.0411411	0.077031	0.0464557	0.0266844	0.0337817	0.0552763	0.045421	0.0280537	0.0143079	0.0119559	0.00510819	0.0127254	0.0237324	0.0210782	NaN
14	0.104748	0.0898479	0.124668	0.117728	0.102086	0.107019	0.068923	0.103127	0.108533	0.0818237	0.0800717	0.0649514	0.040163	0.069053	0.0337945	0.0707284	0.0604825	0.0803528	0.0627848	0.0459603	0.0434249	0.0517875	0.0545869	0.0222247	0.0170587	0.0077297	0.00719808	0.0078262	0.00547386	NaN
15	0.117491	0.0648465	0.0978417	0.105735	0.0687196	0.0805524	0.0700469	0.0649442	0.0848855	0.0598153	0.0723944	0.0656013	0.0396243	0.0378518	0.0399693	0.0518564	0.0476395	0.03224	0.0453769	0.0412644	0.0358499	0.036295	0.0493516	0.0161225	0.0129952	0.00718414	0.0101427	0.0117522	0.0231864	NaN
16	0.0681818	0.0598788	0.0599174	0.0729864	0.0582007	0.0383406	0.068746	0.0566241	0.0409376	0.0478117	0.0371096	0.0450776	0.0457011	0.0424354	0.0380165	0.0447978	0.0412672	0.0313516	0.0552261	0.0287788	0.0271658	0.0197729	0.0094697	0.0284298	0.00659487	0.00722327	0.0105184	0.00501771	NaN	NaN
17	0.064083	0.0578372	0.048502	0.0437678	0.0492092	0.0618837	0.0560216	0.043772	0.0416986	0.0412365	0.0382531	0.0387865	0.0504643	0.0440563	0.0229143	0.0302668	0.0276232	0.0338761	0.0409577	0.0336909	0.0239617	0.0108815	0.0243641	0.0161893	0.00477671	0.0030407	0.00717464	0.0125258	NaN	NaN
18	0.0827056	0.0586683	0.0458246	0.0579101	0.0382021	0.0535247	0.0306432	0.0374076	0.0424344	0.0350499	0.022485	0.0320285	0.036157	0.0335763	0.0172831	0.0206056	0.025387	0.0204408	0.0241352	0.0134905	0.0111723	0.00194458	0.0224793	NaN	0.0100551	0.0060814	NaN	NaN	NaN	NaN
19	0.12871	0.146222	0.104307	0.105286	0.140269	0.1116	0.123939	0.109052	0.133451	0.156919	0.109796	0.0761445	0.153625	0.131734	0.119066	0.0893558	0.0668938	0.0688949	0.111813	0.167497	0.159459	0.146816	0.171459	0.106775	0.0998725	0.094739	0.112799	0.12658	0.0879112	0.0469346
20	0.0940272	0.0983644	0.122758	0.115967	0.130124	0.147655	0.104332	0.111121	0.121109	0.148498	0.109745	0.0843977	0.0896553	0.144359	0.0542744	0.0786654	0.052133	0.0559196	0.0954324	0.196132	0.125201	0.133507	0.226942	0.181614	0.14084	0.0775191	0.0722488	0.081708	0.0636089	0.0293661
21	0.10497	0.104813	0.117307	0.121031	0.0995293	0.115644	0.118883	0.0891974	0.0901604	0.0747198	0.0738829	0.0910567	0.0694473	0.0858076	0.107293	0.0789376	0.0754333	0.0633117	0.0976677	0.136866	0.159899	0.151038	0.109222	0.138382	0.109305	0.109944	0.0752724	0.062294	0.0937512	0.0251631
22	0.135596	0.0949688	0.0855857	0.107886	0.0853628	0.108872	0.105073	0.0788723	0.0792747	0.0789941	0.0708272	0.0957475	0.0741525	0.066208	0.0711383	0.0882955	0.0775588	0.0788711	0.118945	0.162914	0.158134	0.147074	0.108089	0.113131	0.0486981	0.130881	0.0461916	0.0645415	0.0376006	0.0328418
23	0.0762403	0.0971798	0.141192	0.0828401	0.119281	0.0890822	0.110633	0.10807	0.0827545	0.096917	0.0983024	0.111534	0.0837871	0.108377	0.0601907	0.0813585	0.0780892	0.0957938	0.0740778	0.121371	0.237578	0.1422	0.137137	0.103464	0.118136	0.0664336	0.105882	0.0503285	0.0261157	0.0228752
24	0.114658	0.0768895	0.11376	0.110426	0.0910843	0.0902317	0.0723901	0.0824051	0.0930203	0.107701	0.0738571	0.113366	0.0747924	0.0745685	0.0891833	0.0708588	0.0917355	0.119635	0.0814002	0.163599	0.168724	0.143075	0.115134	0.112406	0.0494435	0.051437	0.069914	0.0302638	0.0183413	0.0285947
25	0.082811	0.0729182	0.0963984	0.0987442	0.0998695	0.127303	0.0873323	0.0825105	0.0655477	0.0651229	0.0817264	0.0998059	0.0783197	0.0930631	0.0894251	0.0615329	0.0666439	0.089216	0.0796457	0.149765	0.125017	0.108928	0.082743	0.0679719	0.0821281	0.0958219	0.0600157	0.0244782	0.0163539	0.0203009
26	0.0731184	0.0879062	0.0809136	0.0887033	0.113736	0.0940244	0.0653079	0.0915953	0.0769513	0.0666088	0.0794026	0.0682808	0.0859917	0.0908856	0.083229	0.0936094	0.0668344	0.0910382	0.0701345	0.146694	0.0959518	0.074148	0.0837859	0.118269	0.0599396	0.0665677	0.0219443	0.023067	0.0184853	0.0280416
27	0.0675542	0.0483346	0.0937185	0.0921185	0.112784	0.0847894	0.0982881	0.0953898	0.081263	0.0679469	0.0731583	0.0854063	0.0906256	0.088861	0.0696046	0.0946374	0.0736075	0.10633	0.0589922	0.0987758	0.134197	0.0834417	0.0860398	0.0707192	0.0589672	0.0391073	0.0125926	0.0191794	0.0163327	0.00809177
28	0.0583185	0.0564828	0.0615042	0.0647429	0.0643373	0.0763813	0.0751878	0.0549953	0.0554435	0.0636004	0.0446641	0.058827	0.0591956	0.0636388	0.0937394	0.0621521	0.0500614	0.0601549	0.0634189	0.0712368	0.0547399	0.0552261	0.0396501	0.0517195	0.028865	0.0232247	0.0225467	0.0144573	0.0129721	0.0118844
29	0.0573698	0.060632	0.0594682	0.0655449	0.0680847	0.0722438	0.0575144	0.0407134	0.0381672	0.0488864	0.0609529	0.0668809	0.0456668	0.0399719	0.0485456	0.0684484	0.0641425	0.0550138	0.0588878	0.046098	0.0412957	0.0530899	0.0327426	0.0515683	0.0287185	0.0273169	0.0235405	0.0145098	0.0190304	0.0141772
30	0.0404734	0.0596964	0.0541261	0.0618071	0.0533548	0.0605172	0.0436302	0.0382158	0.0395888	0.0478088	0.0399209	0.0558326	0.0553527	0.0767199	0.0673733	0.11775	0.081797	0.0414982	0.0367972	0.0327881	0.0225495	0.032438	0.0224467	0.0325987	0.0254953	0.0255543	0.0185682	0.0108043	0.00321802	NaN
31	0.0374302	0.0531421	0.0594115	0.0592245	0.0503715	0.0472255	0.0527733	0.0466952	0.0289654	0.0371686	0.0510483	0.0602604	0.0961209	0.101108	0.0640814	0.0525957	0.0587356	0.0504879	0.0304445	0.0308967	0.0239669	0.0354937	0.0263784	0.0433597	0.0304466	0.0142251	0.00721262	0.00891849	NaN	NaN
32	0.0275083	0.0437607	0.0512869	0.0488764	0.0456362	0.0419353	0.0334594	0.0449353	0.0560748	0.0524964	0.0663781	0.0632645	0.0634986	0.067914	0.0545523	0.0403145	0.0339086	0.0527899	0.038977	0.0277509	0.0614597	0.0340129	0.0364073	0.039351	0.0269087	0.0102639	0.00911715	NaN	NaN	NaN
33	0.0281871	0.0270137	0.0290273	0.0404857	0.0435124	0.0417408	0.0363451	0.0522346	0.0412941	0.0486272	0.0635038	0.0424172	0.0528738	0.0517716	0.0503599	0.0456561	0.0350743	0.0305128	0.0484514	0.0367788	0.0583638	0.0312612	0.0258106	0.0247934	0.013321	0.0113171	NaN	NaN	NaN	NaN
34	0.0316804	0.0224784	0.0285228	0.0299988	0.0327938	0.0372294	0.0363232	0.0327835	0.0465245	0.0383171	0.0489377	0.0392157	0.0314345	0.0294661	0.0489372	0.0435334	0.0506411	0.0404996	0.032155	NaN	0.0785124	0.0262183	0.0275797	0.0160723	0.0143541	NaN	NaN	NaN	NaN	NaN
35	NaN	NaN	NaN	NaN	0.0341848	0.0351035	0.041997	0.0474037	0.0579339	NaN	NaN	NaN	NaN	NaN	NaN	NaN	NaN	NaN	NaN	0.12838	0.0407056	0.0518795	0.0487259	0.0213827	0.0221522	NaN	NaN	NaN	NaN	NaN
36	NaN	NaN	NaN	NaN	NaN	NaN	NaN	NaN	NaN	NaN	NaN	NaN	NaN	NaN	NaN	NaN	NaN	NaN	NaN	NaN	0.0569236	NaN	NaN	NaN	NaN	NaN	NaN	NaN	NaN	NaN
37	0.188395	0.218151	0.24871	0.166043	0.161402	0.197215	0.140123	0.141088	0.138238	0.12926	0.161169	0.0884228	0.09903	0.107083	0.106766	NaN	0.118563	0.146837	0.10072	0.115521	0.077759	0.0838253	0.0706754	NaN	NaN	0.0645781	0.0542325	0.0397887	0.0332634	0.0260088
38	0.204119	0.198544	0.285362	0.147011	0.181532	0.21793	0.13642	0.146572	0.135609	0.176436	0.110574	0.0971514	0.102558	0.15932	0.133382	NaN	0.198454	0.196573	0.155363	0.122989	0.0480219	0.0903581	0.0756004	NaN	0.0603812	0.0747934	0.041651	0.0388127	0.0408362	0.035465
39	0.186757	0.196538	0.184772	0.245688	0.25858	0.240971	0.18246	0.171528	0.154492	0.148085	0.12429	0.13118	0.134404	0.105633	0.16764	0.187868	0.1875	0.372455	0.0964767	0.072524	0.105796	0.163251	0.0954361	0.101832	0.078704	0.0566344	0.061431	0.0551099	0.0513424	0.0358914
40	0.275106	0.202804	0.220283	0.226788	0.227552	0.213142	0.190269	0.152211	0.169108	0.130406	0.116447	0.108193	0.0838955	0.126454	0.141315	NaN	0.245535	0.13598	0.0961489	0.108346	NaN	0.134569	0.0848986	0.0521044	0.0630626	0.0507458	0.0595691	0.0554374	0.0620458	0.0373554
41	0.200885	0.247023	0.203934	0.279069	0.28965	0.25047	0.202679	0.124767	0.122298	0.168489	0.115883	0.137103	0.170991	0.116549	0.142282	0.111543	0.169073	0.112471	0.0907244	0.126272	0.0786511	0.109929	0.0739599	0.0620351	0.0948617	0.0791256	0.0609171	0.0590496	0.0511685	0.0433884
42	0.171087	0.23885	0.272211	0.199414	0.185228	0.207444	0.157156	0.111157	0.185621	0.123453	0.164118	0.119995	0.131478	0.100522	0.12188	0.162834	0.139694	0.112623	0.144522	0.10814	0.0940148	0.13539	0.120153	0.0888558	0.0586875	0.109649	0.0857156	0.0333918	0.0397801	0.042391
43	0.192295	0.219995	0.207831	0.196428	0.185563	0.171315	0.168521	0.124016	0.141873	0.10887	0.161807	0.120048	0.113253	0.154373	0.130784	0.195834	0.169498	0.188384	0.165179	0.10652	0.10132	0.132014	0.100726	0.0972887	0.0856451	0.0459137	0.083993	0.0540983	0.0412111	0.0347492
44	0.189893	0.1955	0.165316	0.206869	0.19011	0.190457	0.152814	0.119389	0.0953792	0.0967387	0.108259	0.116988	0.106283	0.139851	0.181028	0.280886	0.160309	NaN	0.122068	0.20175	0.127142	0.112438	0.0752451	0.0559096	0.0982219	0.0673797	0.0640814	0.0530012	0.0500753	0.0413223
45	0.218325	0.225867	0.191523	0.163094	0.206413	0.198909	0.162559	0.122776	0.105047	0.100898	0.110476	0.0906652	0.123167	0.138326	0.151882	0.165855	NaN	0.141586	0.113492	0.0669776	0.122455	0.107588	0.0630921	0.0479653	0.0693538	0.0641888	0.0518516	0.0302254	0.039545	0.0525876
46	0.190798	0.162551	0.189596	0.182562	0.15352	0.156822	0.123085	0.141409	0.0981861	0.106099	0.0837301	0.101375	0.143039	0.0781397	0.1066	0.181992	0.159547	0.0993295	0.0754717	0.128689	0.0838101	0.101963	0.103793	0.0886805	0.0670189	0.0627176	0.0288881	0.0647383	0.0728915	NaN
47	0.135162	0.181166	0.167126	0.178795	0.173347	0.154707	0.148467	0.106028	0.08863	0.0998274	0.0859141	0.104316	0.142686	0.0895853	0.135934	0.105084	0.141297	0.0867769	0.0634711	0.10956	0.0652034	0.114779	0.0525495	0.0455238	0.0227712	0.0381437	0.0423268	0.0388537	0.0317952	0.0274931
48	0.11475	0.124385	0.143899	0.149646	0.152799	0.123216	0.11531	0.0792072	0.107751	0.0822814	0.137265	0.144704	0.0741718	0.0710679	0.0699329	0.0940362	0.0665565	NaN	0.0938159	0.0867491	0.108984	0.0660674	0.039711	0.0307387	0.0360895	0.0349081	0.0231196	NaN	NaN	0.0236841
49	0.139329	0.0899844	0.105546	0.111165	0.0936143	0.104356	0.0966721	0.0795935	0.0833225	0.074948	0.0629448	0.100608	0.100099	0.0669684	0.100297	0.0833381	0.0968841	NaN	0.0798533	0.0606938	0.0626722	0.0347518	0.037787	0.044285	0.032093	0.035124	NaN	NaN	0.0253266	NaN
50	0.0864547	0.0692943	0.0997927	0.105973	0.0692566	0.0849403	0.0562025	0.0593026	0.066613	0.102559	0.0753708	0.104335	0.0689464	0.0700118	0.0770489	NaN	0.0881928	0.0682645	0.0723276	0.0609044	0.0538583	0.0320343	0.0670259	0.0521268	0.0417789	0.0239501	NaN	NaN	NaN	NaN
51	0.0644148	0.0942281	0.0688354	0.0476209	0.0711519	0.0798378	0.0763825	0.0627557	0.0683113	0.0738452	0.0601583	0.0812621	0.0560531	0.0724761	0.114508	0.0639647	0.056954	0.0713749	0.0416045	0.033924	0.0408036	0.0220726	0.0465685	0.0498078	0.0489708	NaN	NaN	0.0217726	NaN	NaN
52	0.0520641	0.0782067	0.0636417	0.0438267	0.0582017	0.0685621	0.0872078	0.0702616	0.0645818	0.0892562	0.0632699	0.098734	0.0608477	0.109022	0.0594356	0.0585961	0.0335577	0.0355309	0.0169387	0.0192837	0.0368541	0.0279806	0.0368691	0.0344445	NaN	NaN	NaN	NaN	NaN	NaN
53	0.0611426	0.0660202	0.0740614	0.0474107	0.0651515	0.0806906	0.0688847	NaN	0.0669856	NaN	0.0521857	0.0450547	0.0312869	0.0456912	0.0377087	0.0325532	0.0264959	0.0315235	0.0330579	0.0327243	0.0326252	0.0387794	NaN	NaN	NaN	NaN	NaN	NaN	NaN	NaN
54	0.0472129	0.0504046	0.0493775	0.0521778	0.0693658	NaN	NaN	NaN	NaN	NaN	0.0239621	0.022154	0.0247934	0.0217845	0.0217462	0.03163	0.0155351	0.0241913	NaN	NaN	NaN	NaN	NaN	NaN	NaN	NaN	NaN	NaN	NaN	NaN
55	0.247344	0.236152	0.292515	0.710675	0.294881	0.306913	0.20219	0.259444	0.235751	0.108314	0.109509	0.108912	0.0829967	0.0775875	0.0753464	0.0816053	0.06125	0.0560858	0.0436961	0.0192265	0.0342137	0.0536948	0.0464934	0.0560528	0.0545202	0.0241918	0.0261441	0.01233	0.0166792	0.0148017
56	0.293288	0.261394	0.315618	0.395725	0.388314	0.180342	0.240712	0.235744	0.182328	0.16338	0.134753	0.106462	0.0874185	0.0745661	0.061468	0.0457938	0.0489536	0.0337435	0.0453848	0.0279667	0.0351769	0.0601361	0.0599289	0.0579343	0.0305457	0.0298423	0.0257144	0.0185841	0.0169837	0.0127662
57	0.338369	0.291816	0.263325	0.341264	0.181959	0.228722	0.255101	0.174923	0.147796	0.167914	0.143244	0.111136	0.0644264	0.07861	0.0781276	0.0537107	0.0567186	0.0555973	0.0304574	0.0360365	0.0391664	0.0324846	0.0519233	0.0458202	0.0193108	0.0223447	0.0255958	0.031517	0.0152767	0.0114259
58	0.240352	0.27856	0.257626	0.248831	0.205465	0.240192	0.268018	0.239598	0.209609	0.116136	0.131494	0.103288	0.115358	0.0874407	0.0695972	0.0330738	0.0475615	0.0385675	0.0494113	0.0451563	0.0410548	0.0784482	0.0432581	0.0319502	0.0320932	0.0202318	0.0241182	0.0216578	0.0122183	0.00978061
59	0.238701	0.191731	0.29737	0.272149	0.312616	0.263707	0.162928	0.202728	0.182042	0.13727	0.0880857	0.0779019	0.0842819	0.0833111	0.0750343	0.0571028	0.0696742	0.0510045	0.0269142	0.0344554	0.0285561	0.0418085	0.0364867	0.0206363	0.0370017	0.0271625	0.0353636	0.0137844	0.0129176	0.00862665
60	0.283764	0.29098	0.262676	0.257265	0.275106	0.233502	0.244077	0.152905	0.143386	0.144897	0.136771	0.0837915	0.0885822	0.068668	0.0500777	0.0621415	0.055516	0.033658	0.0533246	0.035225	0.0555122	0.0316706	0.0216089	0.0232931	0.0212203	0.0377083	0.0202395	0.0132599	0.0137307	0.0148832
61	0.235649	0.224762	0.260293	0.171591	0.24995	0.243705	0.175632	0.212296	0.102313	0.12799	0.0830607	0.0789889	0.0859771	0.0597825	0.082598	0.0534982	0.0623199	0.0613834	0.0329501	0.0311108	0.036825	0.0223115	0.0248186	0.0285707	0.0340604	0.0138593	0.0183909	0.0141853	0.0173059	0.00866275
62	0.136338	0.17243	0.294156	0.186281	0.159425	0.160188	0.183945	0.175456	0.140766	0.131293	0.0823338	0.0807181	0.0648845	0.0787052	0.0517851	0.0412912	0.0538957	0.0437298	0.0388078	0.032054	0.0334853	0.0394259	0.0268168	0.0370559	0.0312663	0.0158643	0.00669774	0.00512469	0.0178806	0.0134414
63	0.144308	0.1348	0.206758	0.198963	0.177053	0.151359	0.118318	0.168861	0.111318	0.0956458	0.0878516	0.0701719	0.0590756	0.0690493	0.0336329	0.0464553	0.0508499	0.0335209	0.0393862	0.0442228	0.0330132	0.0361789	0.0226307	0.0166889	0.0181818	0.00783125	0.0154245	0.0166396	0.00654854	0.013035
64	0.140598	0.13115	0.153656	0.211259	0.175683	0.137708	0.100638	0.118128	0.116581	0.106405	0.0628168	0.0677488	0.0697396	0.0622674	0.0674559	0.0603968	0.0380235	0.0225575	0.036494	0.0215603	0.0330579	0.0275817	0.0204103	0.0234631	0.0130028	0.00684075	0.0158315	0.0179695	0.0130388	0.0108225
65	0.186512	0.131012	0.101708	0.149874	0.174426	0.132976	0.0724069	0.0738248	0.0996403	0.0886232	0.0816182	0.0890338	0.0479554	0.0886225	0.0472188	0.0528291	0.0438303	0.0307847	0.0312332	0.0276794	0.0242264	0.020307	0.0172914	0.0182701	0.0163048	0.0108971	0.0142502	0.0175662	0.0243116	0.0163192
66	0.104531	0.128609	0.131834	0.14778	0.14876	0.149335	0.115457	0.0855826	0.113008	0.0899621	0.0683262	0.0640573	0.0636549	0.0509187	0.0473948	0.0382725	0.0325059	0.0345438	0.0162149	0.0228171	0.0196555	0.0126974	0.017146	0.0194705	0.0175161	0.0205058	0.0132773	0.00826446	0.0088891	0.014681
67	0.0915388	0.0799306	0.102723	0.133307	0.153823	0.109777	0.104797	0.0766008	0.0690975	0.0818503	0.0487875	0.0485062	0.0275936	0.0265843	0.0357316	0.0329885	0.0264524	0.0240994	0.0288993	0.0396878	0.0267328	0.0108662	0.0106064	0.0149469	0.0131037	0.012004	0.0150224	0.0179574	0.0160188	NaN
68	0.0976459	0.125173	0.0794189	0.0946572	0.080313	0.0828014	0.079876	0.0728857	0.043569	0.03847	0.0467581	0.0413612	0.0352533	0.0453289	0.0406276	0.0295031	0.0246576	0.0217191	0.0111907	0.0135199	0.0222149	0.0138903	0.0114533	0.0133892	0.0144231	0.025747	NaN	NaN	NaN	NaN
69	0.0843896	0.0844503	0.135056	0.0832397	0.0703427	0.0680412	0.0712212	0.0565149	0.0365928	0.0322933	0.0384391	0.0332313	0.0325449	0.0343636	0.0404362	0.021192	0.0209408	0.0119768	0.0120369	0.0101589	0.00957705	0.0117502	0.0101306	0.0109552	NaN	NaN	NaN	NaN	NaN	NaN
70	0.0522895	0.064007	0.0713963	0.0691839	0.0645707	0.0490358	0.0396795	0.0423156	0.0421799	0.0281473	0.0322989	0.036295	0.0372374	0.0398299	0.0189866	0.0237533	0.0221869	0.0192356	0.0112206	0.0174996	0.0183045	0.0120248	0.0155715	NaN	NaN	NaN	NaN	NaN	NaN	NaN
71	0.0288586	0.0396521	0.0521563	0.0485238	0.0492136	0.0458834	0.0416672	0.0389533	0.0315264	0.0390973	0.0260852	0.0237129	0.0229691	0.0216325	0.0150733	NaN	NaN	NaN	NaN	NaN	NaN	NaN	NaN	NaN	NaN	NaN	NaN	NaN	NaN	NaN
72	0.0294646	0.042791	0.0350707	0.027823	0.0378238	0.0332415	0.0342815	0.0408289	0.0297833	0.0327299	0.0310901	0.0250566	0.0385675	NaN	NaN	NaN	NaN	NaN	NaN	NaN	NaN	NaN	NaN	NaN	NaN	NaN	NaN	NaN	NaN	NaN

## Sheet: GFP-myr-Garz-DN
	Position
Curve Number	0	0.0344828	0.0689655	0.103448	0.137931	0.172414	0.206897	0.241379	0.275862	0.310345	0.344828	0.37931	0.413793	0.448276	0.482759	0.517241	0.551724	0.586207	0.62069	0.655172	0.689655	0.724138	0.758621	0.793103	0.827586	0.862069	0.896552	0.931034	0.965517	1
1	8.6719	18.1496	16.1116	17.8603	105.592	242.065	202.585	137.18	168.625	215.313	182.871	202.298	290.629	285.742	165.175	139.464	114.828	178.727	215.366	132.285	61.1353	135.788	305.757	237.738	58.7377	39.6112	47.7936	37.0335	14.1456	13.416
2	6.77387	15.0847	23.3037	18.2931	170.119	193.374	189.272	194.341	188.423	248.88	270.419	128.976	193.169	163.361	161.347	158.38	139.906	114.232	59.5543	68.6083	84.8428	44.6146	96.9976	250.714	101.648	54.0006	42.9628	27.5741	14.9533	26.1723
3	5.63543	7.49174	11.7678	35.9583	296.195	263.253	242.457	209.038	202.278	269.126	223.213	145.901	208.935	111.176	88.793	81.8936	113.912	159.088	39.5648	25.307	33.7987	38.0736	34.4518	24.2155	27.103	23.5813	30.3327	22.5106	15.7398	22.2211
4	16.8968	20.0135	33.8599	79.66	130.068	175.702	180.722	116.717	235.678	189.957	80.8471	210.072	283.864	169.081	102.224	59.7611	42.0728	75.9245	20.0501	14.863	20.5963	21.5992	20.9345	28.5608	22.8304	28.4149	29.4782	19.4838	17.5845	23.9382
5	14.6284	19.2632	32.894	98.2949	94.549	107.925	94.8339	115.142	168.138	182.424	100.202	180.861	157.595	102.685	81.8728	89.8987	31.1477	35.726	51.4807	39.3163	32.4293	21.2515	24.1415	40.1339	29.7345	32.0172	39.0011	51.7821	34.1865	24.2393
6	6.30529	19.5001	27.8755	83.7068	107.083	199.854	324.703	285.418	184.311	180.451	97.2566	87.9669	76.4943	71.5829	106.797	66.5527	50.5051	48.185	56.5642	42.2994	31.3942	24.2064	22.3431	35.6652	19.0192	48.1085	74.4688	66.0142	47.7819	21.4228
7	20.7209	26.8657	31.54	67.3031	160.528	440.744	262.26	220.321	119.607	151.563	98.7142	252.538	302.515	131.275	88.7492	74.4862	83.0495	76.4217	76.2301	61.759	62.0676	19.7454	8.91807	14.2961	25.7539	90.2326	60.0678	42.2727	39.1222	27.5612
8	10.2904	22.648	81.2833	119.465	144.586	241.723	205.116	126.597	120.707	178.815	162.433	157.994	141.167	89.8537	85.152	117.731	50.6862	56.753	52.1339	82.038	89.8917	10.6511	13.5919	33.3708	58.0448	116.51	62.5207	16.3889	9.47938	3.89424
9	11.5237	12.9612	40.6124	103.136	136.883	243.033	391.7	191.565	285.926	242.478	231.569	186.389	138.151	195.745	126.44	76.8785	28.6401	23.5642	29.3859	37.0678	34.3332	29.1355	33.9378	46.8136	26.6893	23.5518	14.5382	5.57465	9.82991	2.71886
10	31.7189	25.2706	27.1263	64.1638	96.7134	210.088	164.575	170.599	140.387	244.491	173.111	143.779	186.049	88.785	60.7294	43.0353	39.975	33.4654	71.6119	87.1838	89.738	55.3881	112.199	70.3204	80.801	37.7794	24.9944	21.156	15.026	6.71965
11	41.3264	31.4007	34.0218	54.5784	79.2799	75.3588	115.008	173.194	140.401	230.025	212.294	62.7822	134.788	169.567	165.188	95.9778	146.652	122.701	35.0787	48.5344	84.3249	55.1723	40.4633	21.1623	5.91122	3.42034	1.65258	3.27041	2.70808	2.17853
12	8.7095	13.346	50.0248	136.08	282.535	141.443	205.834	155.844	243.559	399.194	286.81	77.4638	91.1269	97.784	136.144	112.565	68.6262	50.4374	39.6747	31.7003	27.6048	19.7245	15.2209	8.51246	6.04316	2.29439	1.86208	2.09623	4.68342	7.33492
13	11.3223	9.91265	26.77	73.2385	136.611	101.477	185.219	166.927	188.069	363.677	206.43	88.4922	170.541	146.223	52.8229	45.3696	25.3358	38.268	52.4143	41.2618	35.6738	35.037	70.7322	25.6738	17.1256	18.1164	12.5951	7.89001	6.39608	13.5842
14	11.1916	10.4638	27.9554	75.204	77.5658	101.704	263.52	158.887	108.899	164.17	150.992	80.4897	100.363	106.646	90.3325	67.7118	56.4098	45.3003	55.9296	48.3794	24.6536	53.8069	107.866	13.108	10.8256	16.6056	14.3083	9.53432	7.24679	9.29271
15	8.10789	8.11918	17.4485	70.3942	111.224	119.764	142.557	185.604	108.837	137.267	108.276	74.2385	131.462	82.9436	80.9857	107.851	123.071	60.2151	53.3936	74.5203	48.3677	36.4668	36.7654	20.5911	17.8126	17.1616	9.00283	7.12857	3.46112	2.53554
16	7.14981	14.2628	114.883	163.903	102.797	130.931	106.027	238.195	139.517	111.496	135.912	122.791	152.866	89.596	157.508	81.8606	91.1068	47.8064	39.6098	33.9264	25.3872	23.0681	34.9876	26.8088	11.6776	5.94066	6.64937	9.05978	7.71641	4.00492
17	6.58243	6.821	35.282	53.1966	132.08	188.285	128.987	164.921	117.646	63.8395	66.8074	81.6365	90.1094	66.896	145.74	123.596	74.5668	178.512	68.7863	35.7965	19.0136	11.7167	NaN	18.8688	NaN	NaN	NaN	NaN	NaN	NaN
18	13.2215	7.84805	12.7026	22.2145	59.123	102.257	100.82	125.522	93.563	57.3805	151.27	173.732	258.479	154.653	136.377	173.999	110.478	124.236	38.1141	19.7026	22.5878	NaN	NaN	NaN	NaN	NaN	NaN	NaN	NaN	NaN
19	39.5524	12.421	18.6315	46.6485	169.398	468.327	214.945	109.216	128.148	72.4798	115.442	67.6189	46.0925	37.4847	105.236	125.167	82.0403	72.9456	113.713	111.866	37.9169	44.1696	36.7543	19.3009	19.0182	25.1795	26.4929	28.654	27.0115	33.1221
20	19.6828	32.3929	29.8652	66.3019	154.26	482.08	363.406	128.895	178.198	94.3401	122.558	64.0624	50.3565	38.0987	38.812	86.6563	79.0847	36.2885	105.998	420.724	213.229	56.74	40.0681	28.8008	32.0551	9.18141	7.98232	13.1425	22.1116	45.3023
21	12.2799	29.5416	31.1628	118.889	116.629	119.511	176.724	81.6371	68.8214	76.5781	115.972	116.018	65.8858	38.3609	32.4166	76.1627	68.79	31.7358	32.9862	199.167	267.729	73.6125	34.341	20.5773	32.7593	32.5854	21.9122	18.7811	20.0912	31.6178
22	17.8501	29.9112	22.4111	42.9421	75.2655	100.831	148.2	81.4764	90.2805	122.325	175.283	195.41	178.83	39.4306	74.3769	99.1855	72.8018	74.9676	85.0349	156.471	148.696	76.8042	65.3282	47.2136	38.6554	43.6564	31.3646	44.7771	34.4819	21.3661
23	56.3402	63.2275	52.4118	83.492	130.464	168.987	139.27	288.588	149.588	176.235	278.332	319.443	281.601	114.739	181.621	179.957	146.063	122.468	110.953	247.053	253.353	92.8345	79.3237	61.35	66.0883	47.1871	101.253	74.8552	66.4076	23.4017
24	48.7596	72.1874	145.585	150.774	132.643	340.289	374.414	425.181	336.742	225.313	300.617	229.546	344.065	172.384	239.029	146.242	131.421	126.909	177.791	210.874	256.332	164.676	102.702	93.7116	75.3121	55.3382	200.487	210.097	134.93	36.1102
25	16.9436	49.4448	72.7294	54.2402	78.328	196.628	267.075	393.91	457.856	286.143	301.271	208.781	155.616	211.064	184.422	137.548	150.616	131.482	230.744	161.128	89.0579	144.683	215.371	217.578	202.212	115.456	83.3765	149.989	245.752	100.062
26	11.5202	51.3175	87.1044	109.227	271.661	340.498	264.252	181.631	215.337	272.915	152.518	234.477	172.597	218.803	80.2925	104.472	177.759	99.5266	113.167	82.189	99.3955	92.9063	331.965	164.225	107.782	122.402	164.584	105.697	146.246	52.7441
27	12.6543	31.9185	36.0764	92.039	156.374	244.341	256.575	171.569	263.956	417.791	264.773	159.691	141.848	111.05	101.862	107.1	102.611	101.771	212.516	212.26	82.0195	48.287	60.9628	73.5979	53.9534	47.1801	53.1304	38.2879	34.4698	15.4404
28	12.4307	10.8212	17.9337	101.527	286.53	358.538	223.594	194.689	457.28	592.875	275.237	157.037	104.157	147.645	236.198	143.213	66.4302	53.2908	182.038	285.595	85.6226	103.003	83.1284	60.032	26.9159	22.5953	26.7469	25.3677	22.9618	12.1303
29	5.56023	12.9273	22.7168	127.73	336.199	377.111	224.223	230.594	362.571	388.346	306.71	102.745	71.7484	198.648	240.842	204.654	88.6394	86.5451	71.3695	87.6948	90.5746	46.574	149.331	119.295	25.6367	9.7547	13.418	11.1009	15.4111	11.3904
30	7.99711	18.3862	51.025	140.127	271.216	352.212	216.181	296.592	267.833	270.822	212.038	173.024	126.633	143.691	168.797	93.5012	116.689	114.731	60.78	87.5849	104.49	58.8786	256.708	139.54	17.1443	7.76515	4.62247	8.15436	9.92754	17.1354
31	13.2346	26.9209	43.8491	99.387	135.714	328.484	357.711	252.835	214.205	205.888	191.119	195.038	290.764	166.461	123.813	62.6145	62.3051	79.7837	89.543	65.0811	88.2279	45.7339	143.517	40.5014	10.5535	12.2719	7.56604	6.09616	6.16945	7.05715
32	12.1376	29.7884	80.637	145.212	229.384	237.678	280.259	286.727	250.853	260.207	191.513	136.108	165.248	143.848	124.623	73.1144	60.2958	83.6678	158.027	171.714	313.279	247.226	30.207	14.8141	12.329	32.8653	15.3014	7.54418	5.60331	4.64816
33	9.211	29.3661	81.9986	114.453	192.871	191.832	170.385	202.558	183.174	128.984	147.764	100.313	123.641	115.932	185.355	283.165	140.831	200.479	149.53	276.729	206.433	160.779	59.045	29.2923	17.1432	16.8971	10.0784	6.01631	1.93601	NaN
34	10.8471	31.4597	131.448	151.835	155.828	149.131	251.362	228.773	135.015	113.009	204.687	141.504	162.86	113.431	154.573	161.824	200.726	165.55	60.0381	73.7599	76.8964	101.017	95.1024	37.5505	21.0568	9.91896	6.74796	4.43841	NaN	NaN
35	10.5947	18.2658	52.6797	116.31	126.542	171.42	370.55	138.456	66.9544	244.873	465.483	312.091	123.439	56.0664	45.7519	62.123	124.552	59.1962	32.7514	20.1589	29.9013	24.9664	31.3033	27.807	26.7936	20.7934	9.79516	NaN	NaN	NaN
36	9.6864	8.11671	9.80197	18.0872	38.8476	126.32	228.027	86.9369	77.7988	203.36	362.843	282.927	106.001	117.206	123.361	98.9043	56.1195	NaN	345.87	NaN	43.1021	43.6051	29.6352	33.4861	23.1027	16.993	NaN	NaN	NaN	NaN
37	9.3337	33.1559	125.118	187.841	107.255	177.966	156.006	193.462	290.067	173.398	88.9347	70.7501	109.824	145.478	174.943	359.785	170.555	207.564	149.632	88.324	79.0671	42.1819	123.717	141.086	99.4536	77.7304	46.0011	40.6159	38.0298	36.3973
38	9.78575	21.3396	64.2078	164.754	166.4	209.088	158.243	235.143	261.527	161.978	129.794	109.883	74.5088	101.833	189.727	431.083	162.192	241.103	218.253	329.864	309.582	91.217	61.1171	96.1498	192.418	303.015	77.8944	30.0974	26.8388	28.3444
39	8.50029	31.7036	113.449	101.91	125.985	158.244	146.033	190.44	264.813	134.921	244.166	150.503	98.2981	101.149	150.191	385.639	475.703	218.801	236.815	382.92	471.202	423.457	46.3102	52.5054	199.841	139.37	54.4556	62.1232	76.5536	54.049
40	6.76809	110.142	127.286	83.2588	133.157	149.194	216.773	218.487	150.405	200.17	260.294	209.35	253.633	216.16	106.143	101.012	145.732	157.774	210.264	171.268	274.224	200.18	59.8764	57.4969	92.5749	116.107	82.1407	90.6499	121.314	68.8103
41	8.82005	61.6784	75.884	114.323	179.857	138.425	189.795	152.463	130.497	108.007	113.469	108.177	216.166	203.842	118.867	135.709	150.264	235.424	503.595	172.174	163.011	121.175	70.8474	86.53	93.2309	117.52	101.498	63.7521	34.5438	31.1687
42	16.796	30.3171	54.866	65.8281	121.238	111.703	124.72	164.649	153.533	149.149	109.462	105.689	124.307	334.838	100.811	115.993	215.651	127.069	116.599	79.9671	132.124	133.186	176.403	188.543	120.195	103.709	72.3341	43.9231	21.6592	16.5918
43	5.2585	24.6794	24.8499	79.628	132.403	129.872	208.198	220.551	156.677	130.212	119.23	168.069	150.538	284.442	112.918	144.029	313.595	89.4302	41.8786	60.8021	227.613	173.794	258.222	265.708	76.7966	115.357	45.7959	33.8228	31.0643	23.9343
44	5.56591	19.268	28.1896	68.7311	101.877	108.925	250.626	177.459	124.113	197.386	200.085	199.237	110.464	143.727	119.177	258.302	105.734	28.5092	32.5749	47.0551	57.7243	40.7619	75.2682	141.212	78.9322	35.9076	16.0737	23.6389	66.6823	26.8468
45	8.6798	25.9567	43.5187	26.4038	50.1826	64.4226	105.541	93.9719	135.737	133.442	151.379	126.168	58.4386	82.2752	61.8407	126.774	72.9927	30.7281	30.6457	32.5922	42.5165	38.2116	20.1599	73.9922	21.9	15.9213	21.4035	77.6076	40.4428	21.2202
46	4.2836	44.352	48.9587	27.2408	76.644	73.8049	57.1748	107.507	145.611	97.3878	124.852	185.391	61.5878	30.7207	33.0189	42.9175	50.3476	54.97	42.395	33.7738	15.7109	15.6636	13.1111	16.5779	9.67085	12.3575	27.8748	46.9819	16.5331	31.4498
47	5.54574	18.5618	22.1049	31.1732	58.3616	78.8739	72.24	97.207	120.951	104.114	68.5965	111.787	61.1171	37.0145	50.4956	43.3701	69.1969	141.542	61.0081	26.0598	21.9854	11.7645	11.9226	12.0668	16.4384	15.2454	15.7899	14.4668	8.32927	14.7093
48	2.70587	4.25916	11.2774	21.9368	40.7547	89.7293	96.0137	64.9987	72.0759	127.822	73.8598	72.1329	53.332	47.653	26.7274	53.972	90.323	83.4032	59.9739	55.4583	28.2522	45.8028	32.6316	16.6003	20.9231	26.3332	39.2411	15.3933	3.17782	6.54713
49	4.18425	7.08622	18.4072	28.1276	53.5277	73.3822	71.5049	87.8774	92.9705	128.543	97.6963	54.3497	39.3452	59.6622	33.6848	56.3135	79.6074	109.562	84.0562	70.2385	54.9076	82.3541	40.8837	42.0063	28.3394	15.7398	27.7707	27.4741	7.62884	2.62775
50	5.48624	5.68977	16.6281	36.8826	69.3853	64.2236	89.6135	142.664	146.873	112.64	95.8796	52.8785	26.7264	44.1834	56.7732	148.424	51.8403	124.878	113.605	83.9806	63.6389	96.1964	79.5031	46.8887	22.0161	17.6082	18.0949	16.4846	9.32976	1.97823
51	9.37367	12.5804	14.2191	36.2952	80.5018	88.3533	98.9344	145.016	155.455	112.068	157.353	107.713	81.1592	119.921	99.5506	131.765	65.8979	80.0438	112.139	55.765	56.5181	48.1691	72.8025	36.8052	24.3532	20.1675	14.4563	14.17	NaN	3.6013
52	12.5181	17.6138	22.2934	32.6075	79.8491	154.369	106.776	112.887	109.941	139.57	135.982	158.528	153.853	121.769	122.183	152.834	86.1493	68.4444	142.316	67.0463	70.6722	49.3958	52.53	38.4862	44.7899	NaN	15.6246	15.7336	8.6159	2.6236
53	4.65064	10.4623	33.6975	54.3261	80.4348	88.436	43.3395	34.1822	52.2347	76.8194	44.3342	36.9844	63.0697	354.843	167.753	50.3262	27.0463	17.598	14.378	7.92373	12.7862	23.5478	19.8753	21.7578	12.901	12.6904	NaN	29.9019	23.7992	7.15026
54	6.00681	9.11105	38.0524	NaN	37.0097	68.8173	62.783	28.236	57.7505	76.8445	50.1566	26.5478	63.8486	270.382	69.005	NaN	9.7203	12.1637	5.34628	NaN	3.16558	4.59111	2.11555	NaN	NaN	NaN	6.06997	NaN	NaN	2.09817
55	26.7595	53.6664	214.747	61.2868	58.9341	57.0988	113.532	211.938	171.593	119.595	106.764	58.0274	25.6806	24.8585	27.5283	41.3325	44.3109	35.1721	24.795	33.1428	57.4486	45.2333	51.5901	31.767	16.1157	20.5072	20.5864	10.2655	2.56136	3.73973
56	31.1536	55.0734	50.0907	36.9994	60.1007	57.9284	54.0793	58.5785	80.636	88.657	97.2413	119.465	86.9435	61.5773	52.8309	31.0987	26.3564	24.6356	25.8183	43.686	40.9242	35.2306	21.7678	13.0787	18.4615	53.4669	38.8083	27.4546	34.635	66.0707
57	14.5939	51.1647	88.7243	60.6582	78.459	84.4637	75.6797	117.387	124.758	111.557	95.4902	85.8222	43.4678	43.8468	38.9569	39.1902	42.7759	53.2598	47.0736	26.238	26.6617	28.4245	16.7308	54.5577	117.386	18.2399	9.23186	17.469	40.8125	124.844
58	26.9586	45.9545	52.1743	53.138	64.1754	87.8408	75.7993	231.917	203.54	71.2815	54.3794	47.0999	36.8949	36.6962	36.2527	60.2286	198.44	78.3488	36.2493	25.0954	43.978	37.6107	23.4579	32.1771	36.4906	17.2834	13.6655	17.7144	24.8254	26.0525
59	44.7033	54.7003	87.5996	76.7783	99.3747	176.025	57.3696	49.5335	51.288	120.495	180.835	126.682	66.8184	124.866	214.677	252.242	83.9581	47.3644	50.5187	94.0175	180.053	156.325	59.9412	141.531	155.932	35.8143	37.8791	32.2103	35.0744	39.4771
60	23.3659	61.2438	68.9049	58.547	210.343	368.218	193.352	161.596	166.112	234.374	239.469	114.418	102.179	246.687	254.38	183.69	122.543	59.573	55.8131	167.097	558.98	153.104	40.6059	127.673	281.919	99.7641	252.766	76.4257	29.433	53.0979
61	11.377	24.3208	42.1967	59.8226	120.898	188.495	107.096	165.183	192.283	177.759	142.124	112.874	109.545	116.262	154.177	92.8655	103.404	63.0425	149.191	103.049	76.0658	19.646	17.7627	17.75	19.7795	45.9888	358.316	382.888	78.206	42.4347
62	8.41098	11.9339	38.1793	199.03	459.071	201.594	227.759	263.851	258.442	207.46	136.021	163.455	274.501	201.376	115.516	118.292	225.213	198.086	247.758	214.41	113.426	56.3153	32.9704	72.7567	109.658	87.2773	52.2641	39.5384	33.2459	42.5771
63	17.5409	20.9027	30.3205	79.3921	111.447	99.2661	137.795	219.034	176.356	143.449	122.838	120.203	106.698	118.883	46.8995	56.986	314.979	147.663	62.4963	35.6629	16.4651	16.704	34.2693	37.8456	62.4628	67.4727	35.0808	26.3	19.6873	12.1143
64	15.2496	16.6497	26.8055	107.897	207.519	103.393	123.218	132.134	151.887	199.937	132.763	87.9119	67.1889	63.42	33.8799	30.0051	23.9661	27.8854	18.3903	14.3906	21.26	32.8022	48.8352	48.1481	71.0714	81.8888	105.814	89.4153	36.2708	10.8116
65	13.8883	13.5463	25.6619	32.0876	35.8526	51.2178	120.41	155.973	146.525	194.869	133.582	63.4538	43.9125	53.343	64.4968	39.0201	53.6336	20.0144	18.1733	16.6543	19.6607	28.2796	48.1877	73.2973	51.2432	40.4173	39.7516	10.0557	0.556126	0.308981
66	10.7703	9.0977	10.839	18.7119	33.1228	118.525	193.371	268.461	201.369	221.405	146.978	85.7542	63.5547	81.9579	131.866	100.845	70.0521	39.4822	45.4245	46.6889	40.3391	38.5813	39.1281	119.745	22.6023	3.3468	4.85047	3.46481	2.91891	2.11947
67	6.85605	7.3153	12.1143	27.3397	65.3306	88.4793	164.001	155.436	114.662	133.245	124.898	64.2212	60.6857	78.5439	57.2159	59.4664	69.4817	48.1019	67.637	86.919	63.967	34.9615	10.0157	11.2879	6.47754	7.94966	8.1716	6.71288	3.42452	2.43872
68	11.5843	7.74023	30.5401	40.6019	52.5551	55.8057	84.2629	84.3899	101.276	183.159	110.909	108.354	182.885	198.404	91.1313	85.5047	90.1693	80.5783	24.1773	4.87746	8.40621	8.44723	8.2843	10.6379	7.14972	9.07729	7.69643	6.28229	3.5624	NaN
69	10.6246	8.62551	15.89	24.3427	31.1644	39.4749	57.1652	45.94	91.7133	166.254	100.178	74.075	80.5605	38.6579	31.6383	43.4675	15.2236	18.2677	12.0899	6.22159	3.48998	2.03534	2.28109	3.06164	4.37361	3.59982	3.0289	3.6122	NaN	NaN
70	0.940118	3.87076	5.20042	7.67347	74.9696	171.621	204.076	262.968	244.681	51.8812	27.7187	33.9981	34.7938	10.0168	7.44477	34.6694	56.355	36.3946	4.7593	10.5365	25.2754	5.06417	2.50645	2.2292	2.8476	2.89414	NaN	NaN	NaN	NaN
71	0.62585	0.836179	1.02187	2.49145	24.4721	66.7593	32.5852	69.3833	46.625	45.5889	14.4961	8.1737	8.72673	8.90232	10.057	5.4712	4.43442	2.95937	1.02319	2.87786	3.09951	1.8001	1.18041	1.11089	0.47423	NaN	NaN	NaN	NaN	NaN
72	0.256428	0.548209	0.855753	1.04534	2.62246	14.828	89.5469	59.671	72.9614	10.098	NaN	1.78588	NaN	NaN	2.34789	NaN	NaN	1.74942	0.942054	1.32762	1.74185	2.01222	1.32414	0.549587	NaN	NaN	NaN	NaN	NaN	NaN
73	10.5421	16.1842	72.5699	118.996	159.358	199.968	136.31	126.084	138.751	193.386	295.461	304.063	151.868	67.7617	64.8459	66.4286	128.149	89.1844	383.282	720.675	270.999	87.059	96.5316	124.466	172.896	180.025	127.752	58.568	58.8595	31.5088
74	15.219	34.9587	124.324	178.126	154.999	239.736	250.708	160.516	131.28	234.35	218.867	171.254	115.623	72.0903	68.9572	54.8004	118.921	113.644	174.11	164.956	75.8472	42.1045	80.2139	84.0662	128.974	150.714	114.58	72.9968	50.7985	35.0448
75	15.9201	46.9798	63.307	86.6843	125.126	212.48	275.412	220.732	259.281	159.838	232.31	224.38	141.218	112.974	59.3332	82.1717	187.033	466.208	170.513	80.4961	35.337	85.5965	114.003	79.3017	54.7135	113.96	129.358	50.9721	51.1332	71.0814
76	39.8486	70.5925	144.518	180.981	76.0246	119.088	251.281	232.001	278.386	344.22	282.671	279.839	191.584	254.77	580.037	200.317	114.349	65.4941	94.525	80.2444	61.9938	80.6762	111.161	90.7659	76.8967	67.3865	59.081	55.574	89.1255	152.611
77	11.8084	37.7405	72.7764	140.07	180.305	264.102	223.258	385.213	266.014	246.894	228.773	132.062	111.761	213.809	754.681	159.552	134.834	77.1779	88.1683	104.42	161.278	187.009	133.037	48.6537	21.5345	29.4032	55.6008	49.0389	46.127	24.1125
78	17.4278	37.9352	79.6635	155.302	299.855	219.266	156.097	241.671	296.974	220.678	188.396	112.033	76.697	58.0424	153.878	118.777	349.24	281.449	68.6883	56.5449	121.132	124.497	108.378	379.781	223.565	60.0071	242.183	159.896	29.9122	14.7822
79	14.4832	41.9697	42.6677	93.83	256.409	151.387	175.725	222.85	151.178	174.527	135.215	119.355	55.8212	37.9829	73.4124	58.2237	73.4823	50.2569	64.5111	59.6973	82.5976	159.317	149.053	168.909	50.4133	18.4975	57.099	69.2234	18.6403	7.56935
80	25.8642	97.0778	125.653	74.3222	88.2219	86.9319	88.6886	158.028	138.833	70.318	50.7795	109.734	92.013	88.2252	119.108	131.414	98.4231	114.971	98.9154	52.0219	82.944	139.386	170.001	281.946	86.9092	24.0734	23.3967	21.1008	20.265	10.2252
81	12.1697	52.591	173.893	88.826	102.096	96.4505	62.8284	60.653	97.1486	77.5659	47.418	55.2353	99.5681	147.317	148.837	63.3745	55.509	63.7664	61.4094	44.7667	87.8577	89.2095	50.827	39.2161	58.6497	89.7539	38.5083	30.8055	27.6718	58.3931
82	3.66874	4.1273	25.0676	49.3478	61.978	94.4312	156.931	81.2941	77.3098	70.5839	43.2058	62.8745	170.265	153.713	169.984	178.849	33.1496	24.604	24.5912	36.3053	78.4687	119.694	47.5806	40.3867	47.2102	42.1506	33.7686	15.3933	17.9589	15.2691
83	4.77501	4.64175	12.3855	46.7851	67.4893	108.854	178.613	137.156	76.9151	61.6834	57.7646	63.0151	60.2134	31.8593	42.6205	26.8454	23.2929	39.2072	63.1248	107.086	79.7566	51.0053	45.8326	53.2333	67.9984	22.8224	22.3938	11.1943	4.12174	4.10858
84	28.0247	26.6358	26.7115	48.4204	96.5779	104.77	87.1493	113.491	80.4019	47.1647	50.6283	52.8089	48.0194	37.9938	38.3404	18.629	24.9658	40.5204	41.8328	31.403	20.4803	33.7188	42.4467	115.146	91.4282	14.9156	7.97533	10.0742	10.6284	4.20413
85	40.5107	133.447	74.6084	44.3585	54.7526	51.6974	83.4218	77.4425	139.372	45.9475	57.4875	101.335	48.0211	26.7385	34.2308	18.5695	21.0614	39.3695	32.9407	20.9515	8.59556	15.2846	16.5112	27.2655	11.6429	8.80673	7.47554	6.66581	9.68273	6.38839
86	3.93817	33.2287	55.2555	55.2259	64.3587	93.8399	97.2975	64.2413	62.8426	46.9776	35.3016	56.7425	79.1973	77.9706	49.2297	34.9317	31.5143	25.5588	68.8476	95.574	33.3215	14.7753	12.8636	14.5924	11.25	12.5987	11.4724	12.2696	13.3155	31.3649
87	4.34365	10.6135	52.5421	104.712	103.455	70.2989	52.86	60.848	75.0855	83.972	74.494	44.6473	98.5801	88.7519	27.6178	13.5368	24.5751	39.2487	30.7898	40.3039	55.294	27.366	24.7429	16.6223	16.7938	11.894	7.41224	5.7009	15.686	50.3255
88	4.84193	8.72826	19.3803	23.1713	55.5732	82.6869	83.8967	71.8629	61.3619	50.5542	38.572	42.9215	61.0957	37.2178	15.812	12.4613	14.2308	28.9069	74.7749	57.8906	54.3894	30.2029	11.8105	7.7009	6.74372	7.14961	8.44865	7.90721	14.1341	NaN
89	4.8598	12.6605	16.1765	43.076	102.017	188.718	174.468	118.748	193.701	126.047	44.0484	73.3208	154.28	117.7	42.6871	30.6507	12.7362	32.5113	225.695	254.474	50.0914	16.187	44.1283	10.2986	5.81718	8.29416	4.29387	NaN	NaN	NaN
90	10.3042	15.5672	27.5296	41.1561	115.698	214.558	197.093	233.271	178.285	224.781	167.764	166.162	90.1414	76.7101	34.0226	49.9971	19.9213	22.1323	50.1855	NaN	31.6711	10.4228	NaN	22.2034	11.3006	NaN	NaN	NaN	NaN	NaN

## Sheet: Control-Wg-endo
	Position
Curve Number	0	0.0344828	0.0689655	0.103448	0.137931	0.172414	0.206897	0.241379	0.275862	0.310345	0.344828	0.37931	0.413793	0.448276	0.482759	0.517241	0.551724	0.586207	0.62069	0.655172	0.689655	0.724138	0.758621	0.793103	0.827586	0.862069	0.896552	0.931034	0.965517	1
1	0.574681	0.313827	0.723913	0.944265	0.830588	0.380857	0.302963	0.302479	0.145793	0.0979471	0.105455	0.131418	0.0630512	0.0431173	0.0344672	0.0317285	0.036943	0.0621969	0.0855871	0.0529837	0.0363569	0.0283988	0.0301135	0.0433908	0.0265062	0.025845	0.0386222	0.0278496	0.0106622	0.0190087
2	1.13786	0.58586	0.756094	0.632378	0.818906	0.551495	0.518168	0.330289	0.155791	0.120137	0.112333	0.142666	0.0919592	0.0400722	0.0376744	0.0346432	0.0417404	0.0393015	0.0568489	0.0522518	0.0263715	0.0229634	0.0220615	0.0348997	0.0374682	0.0407565	0.0209544	0.0285596	0.0109324	0.00978846
3	0.620412	0.614632	0.748466	0.809395	0.519728	0.660207	0.44452	0.255241	0.129669	0.168537	0.111523	0.203674	0.0958146	0.0627287	0.0315615	0.0363684	0.034091	0.0436269	0.057435	0.0448987	0.0467701	0.0301262	0.0251379	0.0388772	0.0520217	0.041563	0.0315917	0.0345118	0.0131121	0.00970168
4	0.618951	0.548882	0.612668	1.02179	0.746343	0.513728	0.38253	0.360481	0.210444	0.134955	0.159414	0.183254	0.123078	0.0621041	0.0780678	0.0371718	0.064715	0.0499511	0.0363855	0.0293864	0.0253231	0.0223567	0.0310929	0.0421472	0.0541151	0.0518791	0.0456011	0.0431564	0.0278913	0.0427849
5	1.20911	0.803473	0.724167	0.615334	0.696902	0.862191	0.336798	0.411873	0.204878	0.167008	0.110959	0.136241	0.11253	0.0923431	0.0460355	0.0726245	0.0574319	0.0487053	0.0471839	0.0355427	0.0348775	0.018018	0.0265184	0.0383046	0.0414493	0.0540118	0.0467119	0.0333769	0.0135475	0.0102272
6	0.733866	0.728388	0.5567	0.856129	0.446004	0.59621	0.528294	0.289222	0.183401	0.148934	0.114377	0.186803	0.141828	0.100164	0.0679708	0.0630238	0.0473336	0.0470806	0.0489006	0.0290907	0.0320816	0.0227907	0.0272897	0.0274256	0.0584734	0.0273068	0.0412599	0.022032	0.0168169	0.0175418
7	0.872693	0.687693	0.76603	0.911411	0.612502	0.535859	0.460342	0.297989	0.20943	0.117432	0.09546	0.0801224	0.130741	0.0996768	0.0790874	0.0692132	0.0810274	0.0508799	0.0329026	0.0388716	0.0224092	0.0164053	0.0263073	0.0332089	0.0622449	0.0438818	0.0211502	0.0308593	0.0135443	0.0155
8	1.00119	0.86453	0.786505	0.732218	0.739208	0.866233	0.330621	0.259004	0.310706	0.138929	0.0591233	0.0939065	0.127254	0.138979	0.0921528	0.0823651	0.104576	0.0725682	0.0556529	0.0463892	0.0476196	0.0253549	0.0459474	0.0491805	0.0476963	0.0393915	0.0168457	0.0473475	0.0324783	0.0182659
9	0.995891	0.811804	0.502791	0.625533	0.85008	0.631592	0.299258	0.467969	0.264789	0.189721	0.11991	0.136516	0.0767383	0.0768129	0.0597953	0.129509	0.0800518	0.045666	0.081363	0.0595364	0.0336439	0.0339793	0.0303439	0.0459503	0.048543	0.0286564	0.0197526	0.0263484	0.0233409	0.0253171
10	0.960124	1.09708	0.825694	0.783054	0.530689	0.624395	0.531981	0.388014	0.228839	0.217656	0.123286	0.138676	0.189727	0.171511	0.0730845	0.0800845	0.0511154	0.0493368	0.0692747	0.0591085	0.0796862	0.0425453	0.0418018	0.0470952	0.0460011	0.0231345	0.0202329	0.0199194	0.0348695	0.0089394
11	1.29347	0.911876	0.690374	0.627215	0.850189	0.645498	0.360929	0.221559	0.255208	0.210404	0.179183	0.109069	0.103579	0.114493	0.0987594	0.115578	0.0539704	0.0728103	0.0500571	0.0459293	0.0632165	0.0425799	0.0381677	0.0559365	0.0540828	0.0302771	0.0183381	0.0126157	0.0121332	0.00639902
12	2.01137	1.31663	0.552569	0.61928	0.480768	0.567236	0.336667	0.230133	0.333334	0.235951	0.127193	0.138775	0.0936516	0.0766713	0.0995437	0.0693614	0.0741608	0.0389595	0.0474513	0.0526031	0.0564766	0.0351373	0.041846	0.0486701	0.0432846	0.0261618	0.0255664	0.018525	0.0366122	0.0134219
13	1.27424	0.751987	0.725682	0.738297	0.411769	0.340412	0.456364	0.358916	0.279558	0.20475	0.181114	0.103969	0.0972548	0.077662	0.064995	0.0709167	0.0508258	0.0578389	0.072173	0.0357328	0.0481275	0.0411151	0.0436816	0.0310253	0.0236119	0.0279335	0.0225237	0.0289288	0.0302536
14	1.05699	1.02704	0.635825	0.643383	0.999315	0.490825	0.330637	0.334104	0.460075	0.200107	0.156632	0.165212	0.0559009	0.0952052	0.110637	0.0776048	0.0867614	0.083724	0.0875359	0.0606077	0.0372767	0.0579807	0.042859	0.0338564	0.025458	0.0199839	0.0240076	0.0227391	0.0314384
15	0.53752	0.531903	0.741835	0.87054	0.310036	0.361857	0.330428	0.193512	0.225709	0.164164	0.122792	0.0874358	0.0616476	0.0709538	0.0935389	0.076947	0.0766578	0.0498124	0.038322	0.0460221	0.0589824	0.0690222	0.083296	0.0301266	0.0302379	0.0330256	0.0247788	0.0277739	0.00521215
16	0.976514	1.03031	0.621465	0.474121	0.415812	0.47097	0.342994	0.212531	0.167099	0.163786	0.134454	0.093791	0.108421	0.0826858	0.0628385	0.0949179	0.039517	0.0469627	0.0410138	0.0381427	0.0520394	0.038115	0.0222737	0.0219846	0.0148911	0.0282899	0.022103	0.00427117
17	0.901849	0.890847	0.633616	0.591662	0.48758	0.659004	0.392828	0.253294	0.139682	0.131196	0.203395	0.087969	0.117101	0.0930324	0.0706588	0.0589537	0.0516117	0.0371677	0.0859373	0.0432856	0.033949	0.00979023	0.0175755	0.0140685	0.00424725	0.0118445	0.0105452	0.00606643
18	1.42696	1.10031	1.01303	0.59093	0.611393	0.533184	0.446294	0.363901	0.177189	0.141351	0.0908627	0.0903918	0.150294	0.148884	0.0357501	0.0385729	0.0606896	0.0220644	0.0346229	0.0157549	0.0129586	0.0115724	0.0100439		0.00612401	0.00604325
19	1.02653	1.3366	0.718262	0.379942	0.590232	0.37735	0.393123	0.254052	0.144766	0.128532	0.0817556	0.0547912	0.072174	0.0551614	0.034512	0.0184557	0.0116852	0.0158371	0.03294	0.0428683	0.0240058	0.0221787	0.0198005	0.0148742	0.00748003	0.0121026	0.00733563	0.00711491	0.00973522	0.00423344
20	0.855243	0.996376	0.708506	0.31937	0.528995	0.364376	0.206	0.15442	0.142513	0.116979	0.0450119	0.0902183	0.0596749	0.0616465	0.0326347	0.0190486	0.0122541	0.0127234	0.0273723	0.0306895	0.0198258	0.0160012	0.0187518	0.0157914	0.00990864	0.00950416	0.0118475	0.00774394	0.00520445	0.002222
21	0.943936	0.682039	0.557645	0.373677	0.395246	0.210236	0.276579	0.171003	0.138305	0.1003	0.0677231	0.0525101	0.0579321	0.0437813	0.0172066	0.0137894	0.0281774	0.0122959	0.0224213	0.0346339	0.0163998	0.0202842	0.0306375	0.0193194	0.00942063	0.0182849	0.0141988	0.012144	0.00575443	0.00375739
22	0.77497	0.691978	0.450377	0.470105	0.292942	0.266158	0.214298	0.176333	0.16007	0.116283	0.0714529	0.0500562	0.0786337	0.0318158	0.0294912	0.0235214	0.0158959	0.0142734	0.0304566	0.0211771	0.0150177	0.0139766	0.0203673	0.0111059	0.0164565	0.010608	0.00821861	0.00471464	0.00548165	0.00637613
23	1.02782	0.927025	0.4041	0.472964	0.45851	0.201873	0.19581	0.16862	0.12445	0.13239	0.0601689	0.0793016	0.052737	0.0581701	0.0275596	0.0381119	0.0202265	0.0246839	0.0122823	0.0239251	0.0252546	0.0188854	0.0296159	0.00961847	0.0113138	0.00593955	0.00337586	0.00356043	0.00583984	0.0044151
24	0.869486	0.460747	0.643829	0.264148	0.397345	0.434041	0.19452	0.117607	0.152199	0.107214	0.101942	0.043935	0.0571618	0.0203253	0.0293743	0.0186318	0.0240791	0.0181991	0.0206755	0.026524	0.0283098	0.0172945	0.0229453	0.0114746	0.00944194	0.00951605	0.00915826	0.0101029	0.00634563	0.00376116
25	1.19229	0.382222	0.52896	0.808953	0.59174	0.389535	0.133856	0.156733	0.191601	0.116801	0.114726	0.0561224	0.0483976	0.0349747	0.0361123	0.0193031	0.0205444	0.0131664	0.0187343	0.0246607	0.0193169	0.0125635	0.0172808	0.00783917	0.0145824	0.00795889	0.00619331	0.00240308	0.00350856	0.00308647
26	1.02867	1.20226	0.434278	0.712664	0.388242	0.266737	0.230718	0.175584	0.167749	0.0664274	0.0777078	0.0782344	0.044703	0.0479476	0.0182701	0.0231458	0.0181652	0.0158294	0.023725	0.0109978	0.0185083	0.0236707	0.0143518	0.00783355	0.00689817	0.010681	0.0100415	0.00405361	0.00294301	0.00378692
27	1.03014	0.627561	0.658848	0.44072	0.217634	0.24207	0.159444	0.129557	0.123231	0.0926771	0.099829	0.0461482	0.0433322	0.0501446	0.0293032	0.0253957	0.0200524	0.0129981	0.0100374	0.015275	0.0199678	0.00906596	0.0133145	0.00880717	0.00899959	0.00773865	0.00330918	0.0042905	0.00262352	0.00579701
28	0.662652	0.943751	0.590746	0.369425	0.306139	0.288097	0.17148	0.124409	0.107855	0.144861	0.0776835	0.0490775	0.0449705	0.0423042	0.0341211	0.0216468	0.0289559	0.0268471	0.0100731	0.0159409	0.0139386	0.0118624	0.0102306	0.00816385	0.00463844	0.003575	0.005219	0.00203777	0.00346646	0.00304517
29	1.10008	1.36346	0.677825	0.442153	0.321359	0.263304	0.207953	0.143273	0.081206	0.0367628	0.0703366	0.0657968	0.0333176	0.0182726	0.0253855	0.0295927	0.0155489	0.0191693	0.0160898	0.0125899	0.00767123	0.00354258	0.00464552	0.00685682	0.00523308	0.00294511	0.00264787	0.0027139	0.00188297	0.00107919
30	0.991439	0.812089	0.514128	0.305582	0.306429	0.222467	0.0939312	0.0918197	0.129594	0.0735942	0.0371057	0.037005	0.0498266	0.0296662	0.0224781	0.0274877	0.0321033	0.0228031	0.0143069	0.0141098	0.00723076	0.00611252	0.00465126	0.00668611	0.00679354	0.00524184	0.0033141	0.000891407	0.000863161
31	0.856753	0.524701	0.56415	0.331042	0.195458	0.152172	0.120899	0.111488	0.0459798	0.0684544	0.0544053	0.0313113	0.0411388	0.0665633	0.0387915	0.029072	0.0237647	0.0197268	0.0103803	0.00504916	0.00662582	0.00451166	0.00525119	0.00527278	0.00650966	0.00529774	0.00180293	0.00154051
32	0.82322	0.962963	0.570747	0.329404	0.308499	0.169368	0.201382	0.0823874	0.0646726	0.0595733	0.073554	0.0540238	0.0306518	0.0195755	0.0195215	0.0116759	0.013609	0.0102586	0.00824673	0.00967982	0.0103773	0.0179696	0.00933958	0.00964803	0.00716583	0.0030707	0.00228237
33	1.07864	0.746848	0.571416	0.389086	0.209016	0.205731	0.104871	0.162827	0.0969476	0.0939506	0.0497408	0.0382429	0.0181753	0.0221317	0.0251745	0.0198439	0.0170282	0.010527	0.013898	0.019304	0.0165978	0.0115442	0.00644407	0.00915149	0.00412245	0.0030327
34	1.61816	0.780278	0.614971	0.37227	0.439247	0.319782	0.164124	0.143228	0.0756845	0.061208	0.0798143	0.0506486	0.0228009	0.0231981	0.0107325	0.0299367	0.0185122	0.0403841	0.0272498		0.013052	0.0101231	0.00874733	0.0104622	0.00394247
35					0.570037	0.397816	0.113024	0.170545	0.142479											0.0197244	0.0129761	0.0215147	0.0188675	0.013726	0.0123693
36																					0.0394499
37	1.1332	0.847972	0.738866	0.865985	0.367001	0.55793	0.276203	0.201944	0.207567	0.110377	0.143448	0.0723631	0.0630691	0.0768253	0.0695238		0.112308	0.0811589	0.110105	0.0619907	0.0477926	0.0442643	0.0338927			0.0444211	0.0549456	0.031545	0.0188517	0.0269955
38	0.873469	0.66396	0.749332	0.536075	0.546277	0.573054	0.228675	0.219006	0.217318	0.140192	0.10544	0.0735425	0.0680571	0.0928409	0.084523		0.108153	0.124486	0.0730099	0.0804392	0.0633033	0.0630563	0.0361406		0.0451355	0.0479261	0.0213933	0.0416224	0.0296531	0.0181771
39	0.992292	0.649712	0.881168	0.80097	0.756047	0.550771	0.394745	0.359996	0.227053	0.178148	0.112274	0.0828365	0.0955658	0.0907041	0.11104	0.12556	0.16474	0.108586	0.0816068	0.0842007	0.0369005	0.079087	0.0652819	0.0500918	0.0389261	0.0523814	0.0451254	0.0373368	0.0283935	0.0182142
40	1.09054	0.667692	0.805377	0.900028	0.420212	0.308088	0.344571	0.197242	0.146675	0.127389	0.0948045	0.111427	0.0511609	0.079167	0.1024		0.2004	0.104443	0.0614823	0.0651617		0.0450183	0.0307303	0.0469451	0.0324746	0.0305841	0.0184592	0.0391302	0.022941	0.023393
41	1.1228	0.761884	0.702131	0.749355	0.741176	0.48279	0.328814	0.239726	0.149552	0.148344	0.146317	0.0991542	0.0983173	0.0702422	0.0960654	0.097288	0.144946	0.0775606	0.0640432	0.0446747	0.122362	0.0771314	0.0884716	0.0499057	0.0583577	0.031242	0.0329877	0.0336996	0.0218994	0.0311969
42	1.13535	0.890722	0.582115	0.659101	0.456749	0.643646	0.272462	0.26438	0.192849	0.102981	0.154846	0.0908257	0.103509	0.0913658	0.0983763	0.0998624	0.0914142	0.0820453	0.0871241	0.0484604	0.0898941	0.0730089	0.0385709	0.0465709	0.0575702	0.0386876	0.0389666	0.0236623	0.0198506	0.0134626
43	1.07143	0.785006	0.841014	0.63108	0.526486	0.371071	0.408775	0.202308	0.115223	0.142797	0.159969	0.108074	0.0681886	0.132863	0.0808378	0.0778532	0.128913	0.077323	0.0734941	0.0624208	0.0495828	0.0540979	0.0635269	0.0334418	0.0232047	0.0230003	0.0337064	0.0259604	0.016945	0.0145897
44	0.974407	0.775713	0.470976	0.790712	0.57896	0.510597	0.412547	0.224191	0.143434	0.174089	0.0758135	0.0981732	0.0738306	0.0757422	0.079384	0.144062	0.0930352		0.0860497	0.0761962	0.0790108	0.0823938	0.0509143	0.0172411	0.0251424	0.0415217	0.0342132	0.0177958	0.009736	0.0173784
45	1.07318	0.987076	0.619718	1.01906	0.652364	0.405548	0.40281	0.297689	0.176836	0.147133	0.101141	0.111754	0.0758766	0.0919524	0.0876446	0.0967325		0.0851832	0.105339	0.0627099	0.0591769	0.0664346	0.0409688	0.0190516	0.0322127	0.0290573	0.0240074	0.0298277	0.0188189	0.0325216
46	0.923982	0.793283	1.01074	0.963928	0.688834	0.565191	0.366177	0.286574	0.14904	0.12188	0.100387	0.117963	0.083077	0.0812544	0.0657598	0.0599274	0.0603135	0.0778282	0.11422	0.063977	0.0413274	0.0434868	0.0348939	0.0297419	0.0171952	0.018044	0.021355	0.0339345	0.0276316
47	1.00332	0.564979	0.767664	0.73718	0.517187	0.392171	0.377687	0.237729	0.245341	0.193062	0.0912187	0.079329	0.0769087	0.0560884	0.0995473	0.0669072	0.10295	0.0757257	0.0496143	0.0360971	0.0604194	0.0512576	0.0431558	0.0348841	0.0194729	0.024228	0.0178453	0.0243452	0.0313141	0.00947769
48	0.984457	0.814937	0.67231	0.609714	0.588986	0.51083	0.325815	0.318594	0.197087	0.132361	0.062207	0.160173	0.0981077	0.0635355	0.0717676	0.0532797	0.0402054		0.0496071	0.0728956	0.0509106	0.0615974	0.0317658	0.0305769	0.0157925	0.017091	0.0142489			0.010362
49	0.814498	0.581671	0.834957	0.63498	0.450682	0.500403	0.355703	0.277439	0.200011	0.146844	0.149359	0.111298	0.0749876	0.0616005	0.0780681	0.0454724	0.0573683		0.0510763	0.0489533	0.0407946	0.0317247	0.027271	0.0303427	0.0127687	0.0232291			0.018754
50	0.892836	0.576794	0.696258	0.723632	0.542805	0.574218	0.311361	0.227391	0.16219	0.106253	0.103642	0.106228	0.0624983	0.0909814	0.0693493		0.0859868	0.0635406	0.0742643	0.0711126	0.0412104	0.0279699	0.0219927	0.0294548	0.0261924	0.0170226
51	0.610341	0.842157	0.532936	0.470311	0.687782	0.396777	0.376306	0.160604	0.110671	0.153316	0.124058	0.0928551	0.0685301	0.0715682	0.0600426	0.103051	0.118682	0.069622	0.0397447	0.0311712	0.0307723	0.0246985	0.0304729	0.0171791	0.0268835			0.0173374
52	0.910478	1.30741	0.939607	0.616069	0.60196	0.525004	0.489345	0.222975	0.18876	0.145132	0.106918	0.101305	0.0490826	0.0608961	0.0389055	0.0490922	0.0412871	0.0447687	0.0356104	0.0247275	0.0243108	0.0369532	0.0493651	0.0285233
53	1.1991	0.680754	0.926852	0.693937	0.627206	0.595705	0.427094		0.148327		0.0832264	0.0541368	0.0396067	0.0599266	0.039434	0.0297036	0.0289229	0.0437398	0.0407916	0.0355889	0.0185632	0.0149377
54	1.53553	1.22621	1.21203	0.809793	0.932425						0.0386559	0.0275682	0.0274673	0.0174879	0.0402555	0.0279348	0.0514333	0.0169298
55	1.31713	1.17027	0.723832	0.780987	0.446882	0.463516	0.183187	0.24727	0.159195	0.141694	0.162648	0.119474	0.0701203	0.096742	0.0569797	0.0370676	0.024094	0.0196106	0.0141741	0.0112975	0.0130658	0.0199328	0.0234893	0.0121554	0.0114874	0.0146238	0.00947998	0.01031	0.00529889	0.00489756
56	1.13931	0.88549	0.708	0.794338	0.550813	0.330737	0.183593	0.167365	0.209389	0.211344	0.163214	0.119046	0.0708024	0.0553614	0.0524646	0.0319812	0.0198303	0.0176227	0.0121846	0.0115744	0.0154307	0.0263878	0.0176983	0.0101007	0.0151494	0.0132283	0.0107442	0.00845617	0.00937099	0.00800191
57	0.984848	0.870131	0.735096	0.656805	0.625975	0.353942	0.302617	0.212344	0.154399	0.158199	0.131889	0.0606177	0.0720508	0.055228	0.0535522	0.0410829	0.0244943	0.0234283	0.0106827	0.0162945	0.0207545	0.0161248	0.0162434	0.0109375	0.0090679	0.00810597	0.0109963	0.00885766	0.0030205	0.00352672
58	1.17254	0.744753	0.958751	0.798183	0.417835	0.395103	0.249674	0.249948	0.194618	0.18552	0.133014	0.0902688	0.0895448	0.0750697	0.0514511	0.0404418	0.0249971	0.0131272	0.0137315	0.0121766	0.0201031	0.0358441	0.0169362	0.0156659	0.00863793	0.011092	0.00427083	0.00364699	0.00360188	0.00340329
59	0.861327	0.799004	0.865676	0.71761	0.449599	0.310189	0.255796	0.350291	0.177911	0.151228	0.124776	0.121542	0.0907427	0.0673875	0.0449003	0.0369469	0.0296006	0.0213599	0.0152672	0.0105633	0.0123249	0.0182404	0.0128129	0.0071272	0.0107371	0.0122684	0.00732413	0.00889601	0.0027499	0.00445022
60	0.870915	1.44692	0.717793	0.55945	0.44167	0.270093	0.162673	0.181611	0.162535	0.134259	0.119337	0.0876741	0.0601364	0.0600181	0.0401387	0.0377017	0.0271523	0.0229782	0.0101375	0.0110996	0.0208146	0.0132616	0.0136821	0.00981161	0.0120247	0.0107906	0.00867896	0.00687785	0.00414214	0.00255527
61	1.11185	0.974672	0.529471	0.801061	0.458401	0.297756	0.231456	0.223275	0.157075	0.111316	0.107549	0.0775022	0.0569453	0.0492951	0.0382391	0.032007	0.0256752	0.00991998	0.0194568	0.0129436	0.0146601	0.0111785	0.00590808	0.010332	0.012833	0.00675282	0.00582917	0.0114726	0.0117952	0.00329594
62	1.03505	0.586242	0.700989	0.462722	0.293147	0.275971	0.360515	0.192295	0.151706	0.135427	0.119301	0.0897012	0.0583819	0.0439855	0.0381346	0.0234675	0.0251893	0.0154768	0.0112156	0.0168877	0.00978305	0.0178999	0.00916987	0.0111337	0.0110914	0.00683157	0.00611937	0.00478482	0.0051816	0.00389352
63	0.86594	0.652728	0.771221	0.567353	0.374944	0.293447	0.266519	0.234516	0.138998	0.160698	0.101394	0.0688415	0.062445	0.0476881	0.0272163	0.0269204	0.0229496	0.0169556	0.0253399	0.0169655	0.0100466	0.0116665	0.0129297	0.0143468	0.00957683	0.00760479	0.00422641	0.0009071	0.00155398	0.00139585
64	0.696277	0.572441	0.398139	0.366818	0.458959	0.24343	0.149388	0.136284	0.137248	0.129586	0.10556	0.0682386	0.0440848	0.0387376	0.0401808	0.0232791	0.0200918	0.019012	0.0129887	0.0161664	0.0168904	0.0114326	0.0122492	0.00927881	0.0111566	0.00564816	0.00678012	0.0070319	0.00183243	0.0030961
65	0.935146	0.820437	0.616182	0.405354	0.29199	0.324088	0.229813	0.109507	0.145541	0.0489753	0.0803421	0.0471643	0.0395521	0.0355524	0.0257179	0.0201814	0.0202086	0.0194976	0.0155653	0.00935712	0.0096298	0.0103545	0.00984477	0.00589577	0.00556166	0.00156789	0.00205294	0.00535743	0.00563332	0.00321587
66	1.37524	0.970281	0.699491	0.432814	0.340815	0.144599	0.136817	0.111159	0.134318	0.0863484	0.0406991	0.0430588	0.0418271	0.0317854	0.0319541	0.0254635	0.016904	0.0177503	0.0130247	0.00934995	0.011207	0.00673206	0.00576012	0.00524979	0.006857	0.00484752	0.00464453	0.00382657	0.00128411	0.00262311
67	1.20154	0.708479	0.591702	0.366834	0.267298	0.203363	0.202017	0.115852	0.101152	0.0671234	0.0405617	0.0602552	0.0460587	0.0349863	0.0307829	0.0180252	0.0146592	0.0163314	0.00884045	0.00916434	0.00698423	0.00734095	0.0079982	0.00729051	0.00494945	0.0023944	0.00417751	0.00185226	0.00589889
68	1.13336	0.656194	0.435813	0.417924	0.244385	0.214457	0.17635	0.116859	0.11465	0.0768217	0.0542577	0.0514244	0.0258014	0.0351341	0.0265342	0.0215837	0.0227916	0.0119795	0.00699695	0.0039357	0.00661541	0.00404841	0.00598098	0.00432414	0.00580521	0.011177
69	0.781552	0.845343	0.772966	0.436509	0.217063	0.207973	0.150776	0.0844435	0.1007	0.0571279	0.0524167	0.0406328	0.0239474	0.029278	0.0176725	0.0164385	0.0163893	0.00802778	0.00431284	0.00417875	0.00528049	0.00983374	0.00762031	0.00359455
70	0.817718	0.799358	0.560319	0.426662	0.277566	0.160277	0.121514	0.153038	0.107856	0.0638605	0.0558691	0.0265282	0.0364597	0.0348361	0.0226528	0.0186919	0.0113425	0.00945399	0.00917468	0.00525765	0.00486455	0.00203049	0.00819731
71	0.780782	0.991301	0.502218	0.294375	0.27765	0.207447	0.160815	0.0923472	0.106694	0.0853558	0.0468409	0.0330851	0.0274391	0.0274654	0.0193588
72	1.11273	0.945679	0.914626	0.428736	0.36179	0.146339	0.105795	0.0867755	0.118339	0.0600086	0.0211934	0.0172524	0.0250579

## Sheet: myr-Garz-DN-Wg-endo
	Position
Curve Number	0	0.0344828	0.0689655	0.103448	0.137931	0.172414	0.206897	0.241379	0.275862	0.310345	0.344828	0.37931	0.413793	0.448276	0.482759	0.517241	0.551724	0.586207	0.62069	0.655172	0.689655	0.724138	0.758621	0.793103	0.827586	0.862069	0.896552	0.931034	0.965517	1
1	1.25814	1.66546	1.03915	0.893373	1.11903	0.215498	0.411584	0.234964	0.106491	0.102875	0.0424086	0.0765829	0.0699085	0.0697424	0.0356007	0.00388044	0.00148428	0.00310564	0.00117439	0.00139389	0.00110012	0.00330723	7.35919e-05	0.000169093	0.000372505	0	0.000380883	3.81501e-05	0.00031196	0
2	1.80121	1.65857	1.03289	0.952319	0.464382	0.340919	0.219922	0.270925	0.304929	0.162015	0.0296769	0.0542249	0.0492968	0.00995842	0.0180017	0.0146276	0.00521578	0.00888509	0.00288882	0.000912163	0.00122041	0.00121762	0.00130637	0.00153352	0.000645572	0.000677822	9.5344e-05	0.000245859	0	4.34648e-06
3	1.21303	0.881685	0.965917	1.0914	0.583792	0.308898	0.246463	0.139522	0.174203	0.205417	0.189385	0.0668177	0.0154811	0.0496629	0.0247922	0.014767	0.0073223	0.00964294	0.00225797	0.000584995	0.00169517	0.00119399	0.00153843	0.000200446	0.000732063	3.07462e-05	0.000296358	0	6.62099e-05	0
4	1.5324	1.61483	0.766322	0.630108	0.631121	0.391662	0.311769	0.250433	0.152463	0.124211	0.10673	0.116075	0.0686427	0.0177553	0.0156168	0.0082088	0.000772	0.00115554	0.00169627	0.000656999	0.000405116	0.000331388	0.000572253	0.00187559	0.000871055	0.000273114	3.54248e-05	0	0.000409579	0
5	1.49136	1.71747	1.19025	1.04368	0.542196	0.363352	0.280724	0.278772	0.169852	0.147514	0.0534008	0.0649934	0.0738841	0.031065	0.031732	0.00953269	0.00516897	0.000302977	0.000990282	0.000223697	0.00205232	0.00110517	0.000533228	0.000192749	0.00051176	0.000104925	7.00265e-05	0.000538147	0	0
6	1.27459	1.20152	1.00783	0.504672	0.885064	0.308056	0.223446	0.241615	0.284123	0.177094	0.0648795	0.0510008	0.0511009	0.0507291	0.0158651	0.0116579	0.00224055	0.00169428	0.00356497	0.00105242	0.0017651	0.00043998	4.36487e-05	0.000726411	0.00126822	0	0.000276984	8.45659e-05	0	0
7	0.919273	0.731839	0.294279	0.526964	0.605194	0.614845	0.369409	0.0976751	0.132624	0.140822	0.0558016	0.0698145	0.028116	0.0250142	0.011899	0.000702187	0.00393378	0.00413906	0.016914	0.0089409	0.00133311	0.00277173	0.000121317	0.000338062	0	0	0.000233899	7.22797e-05	4.6788e-06	1.16693e-05
8	0.929955	0.929612	0.799943	0.662676	0.307326	0.40804	0.221963	0.230488	0.121263	0.0578237	0.0912038	0.063874	0.042502	0.0353644	0.0131553	0.00897221	0.0027035	0.000473187	0.00145358	0.00191905	0.000636909	0.00181954	0	2.1138e-05	0.00352209	0	0	0	0.000142485	2.79587e-05
9	1.26222	0.884167	1.20647	0.623504	0.561229	0.323146	0.297383	0.0787618	0.177282	0.136325	0.0203346	0.0392296	0.0869598	0.0160955	0.015244	0.00834559	0.00641151	0.000931016	0.000330813	0	0.000454386	0.00011238	0.00345901	1.10623e-05	6.25133e-05	0	0	0	0.000524957	0
10	0.991891	0.794207	0.750537	0.499995	0.5868	0.443228	0.273235	0.0842691	0.152856	0.167445	0.102008	0.184476	0.022878	0.0403452	0.00920481	0.0301076	0.00447726	0.00201089	0.00407425	4.59902e-05	6.2199e-05	0.000216466	0.000289625	0.00063491	0.000275114	0.000384056	0	0.000154219	0	0
11	0.901241	0.423076	0.933334	0.742381	0.317473	0.265388	0.189423	0.169027	0.14691	0.120004	0.0382158	0.0541742	0.0483913	0.00932091	0.00964084	0.0150319	0.000520074	0.000990917	0.00131727	4.85999e-05	0.000258069	0.00135565	0.000494719	0	2.55327e-05	0.000213473	5.61833e-05	0	7.91147e-05	0
12	0.987279	1.61377	0.685193	0.647466	0.387725	0.230592	0.117567	0.159268	0.0726923	0.0384675	0.0338165	0.0214786	0.0751142	0.00846295	0.00214511	0.00307416	0.00377055	0.00117217	0.000196943	0.000707079	0.000156285	1.59532e-05	0	0.000134609	0	0.000114178	0	0	0	0
13	0.657583	1.17682	0.82387	0.525927	0.283659	0.385798	0.654859	0.0801463	0.0450102	0.0440008	0.0799616	0.0411662	0.0158749	0.00591989	0.00114964	0.00200805	0.000546273	0.00337605	0.000236404	0.000237313	3.21857e-06	0.000103958	0.000199427	0	0.000444317	0.000183551	0	0.00013569	0	0
14	0.437937	0.99053	0.573822	0.917359	0.141053	0.109263	0.0712092	0.11113	0.0640211	0.0543445	0.0456585	0.0629286	0.0196657	0.00493565	0.00383126	0.00612465	0.00129458	0.00378001	0.00244033	0.000460425	0.00012033	0	0.000702354	0.000268083	0	0	0.000577701	1.13963e-05	0	0
15	0.482797	1.07599	0.852168	0.451403	0.329081	0.144838	0.125768	0.0916535	0.0522986	0.0335617	0.00888372	0.00343793	0.0234325	0.00407302	0.00240443	0.00817541	0.00139071	0.000664175	0.000628243	0.000926375	0.00133681	0	0	0.000260879	0	0	0	0	0	0
16	0.621532	0.811723	0.37289	0.430257	0.279813	0.174757	0.17388	0.101558	0.133728	0.00907942	0.00932968	0.0188348	0.00476294	0.00410988	0.00263197	0.00081975	0.00158794	0.000454702	0.000303441	0.000959485	0	0	9.52357e-06	0	1.08218e-05	1.34191e-05	0	0	0	0
17	0.721289	0.723341	0.762955	0.374659	0.469914	0.187789	0.153787	0.0654019	0.0521205	0.0571457	0.0110663	0.029006	0.00344228	0.00374213	0.000501386	0.000474674	0.000547907	0.000160781	0.000152191	0.000342245	0.00163574	0		0
18	0.824368	1.27979	0.784465	0.414247	0.375003	0.256201	0.141355	0.0223343	0.0268715	0.0135699	0.005206	0.0015505	0.0086363	0.0048512	0	0.000186234	0.000208499	0.00113968	0.000556457	0	0
19	1.21045	1.32314	0.955925	0.789289	0.369814	0.314947	0.257416	0.176928	0.232556	0.149284	0.168951	0.0943234	0.0921208	0.0603018	0.0812838	0.117916	0.0875489	0.0226861	0.0453467	0.106184	0.0538138	0.0273858	0.0337435	0.0244376	0.0184721	0.0236649	0.0142485	0.0106215	0.00983974	0.00867931
20	1.13841	1.26721	0.77469	0.989398	0.588402	0.470601	0.319587	0.175265	0.199104	0.128963	0.0977302	0.0847141	0.0949518	0.0849684	0.0583132	0.0587176	0.0525726	0.0388768	0.0472628	0.0733641	0.0484836	0.0237548	0.0305698	0.0472701	0.0293341	0.00717104	0.0074251	0.0167151	0.0141479	0.00736303
21	1.44178	1.17655	0.857003	0.846753	0.487609	0.34843	0.266017	0.16898	0.172937	0.102678	0.081004	0.080711	0.0938683	0.0679172	0.0563447	0.0624376	0.0393522	0.0192845	0.0245335	0.0360787	0.0564478	0.0211179	0.0199612	0.0108718	0.0189531	0.00524545	0.0128771	0.0178079	0.00778007	0.00562532
22	1.4076	0.861075	1.10642	1.03986	0.519046	0.341423	0.358382	0.222452	0.165918	0.142969	0.0897477	0.0748138	0.0883311	0.041754	0.0560898	0.0824043	0.0480332	0.0192073	0.0325702	0.0287919	0.0592233	0.0358123	0.0145814	0.0124178	0.00545913	0.0032747	0.00339533	0.0138	0.00658254	0.0090579
23	0.818685	1.21525	0.79109	1.0054	0.589981	0.398681	0.450444	0.270904	0.174516	0.209776	0.190211	0.0948824	0.0696092	0.0388775	0.0499658	0.0878663	0.0469778	0.0245025	0.0317738	0.0365059	0.057276	0.0291183	0.0475703	0.021848	0.0102298	0.00183787	0.003349	0.00468291	0.00496089	0.00515128
24	0.871836	0.969284	1.00185	0.763194	0.586823	0.50079	0.381965	0.141933	0.194577	0.194242	0.188953	0.137086	0.11183	0.0380295	0.0630446	0.0810524	0.034858	0.0366598	0.0357929	0.0446475	0.0943466	0.0343809	0.0299209	0.0124459	0.01971	0.00333753	0.00935354	0.00573422	0.00468294	0.00102028
25	0.990367	1.27962	0.568211	0.660491	0.458068	0.442095	0.270406	0.123701	0.211091	0.130105	0.139862	0.0774647	0.110113	0.0819041	0.0885696	0.0673708	0.0469837	0.0188478	0.0444949	0.0500023	0.0330036	0.0167797	0.0255007	0.0240152	0.0085064	0.0117844	0.00904225	0.00332065	0.00346742	0.00130776
26	0.936017	1.03632	0.937159	0.718945	0.309948	0.445737	0.197133	0.180024	0.206963	0.123965	0.0923809	0.113769	0.107998	0.115504	0.057076	0.0763748	0.0791868	0.0488757	0.0402443	0.0803527	0.0415251	0.0300308	0.0363032	0.0237875	0.00668442	0.0100425	0.00884395	0.00984097	0.0105732	0.000303546
27	1.0219	0.949745	1.09542	0.87239	0.340029	0.228781	0.246428	0.215895	0.14121	0.164351	0.0760329	0.0752897	0.133604	0.0724061	0.0547978	0.0457978	0.0541266	0.0374358	0.0515246	0.0820649	0.0796395	0.0376163	0.0251241	0.047855	0.00563248	0.0135682	0.00292359	0.0107939	0.00915336	0.00258003
28	1.03706	0.921863	0.87073	0.589159	0.37842	0.46617	0.212447	0.292034	0.0857042	0.0706757	0.0959244	0.080973	0.0561273	0.0540314	0.0518891	0.0538594	0.0492638	0.0330099	0.0360335	0.049	0.0233847	0.00733573	0.00352481	0.0138231	0.0181528	0.010453	0.00275259	0.00599729	0.0105108	0.00258744
29	0.950629	0.919904	0.651832	0.537859	0.508555	0.434045	0.181114	0.172419	0.13654	0.0868076	0.120362	0.0729858	0.0421172	0.0562192	0.065016	0.0780989	0.0412517	0.0259502	0.0278993	0.0208451	0.0137318	0.0299054	0.00924543	0.0135004	0.0256316	0.00503948	0.00299556	0.00289612	0.003946	0.000846587
30	1.12737	1.12856	0.579833	0.551799	0.569618	0.431563	0.237489	0.204226	0.17798	0.11101	0.0910474	0.0671594	0.0454108	0.0468712	0.059031	0.0358361	0.0501648	0.0660449	0.0416123	0.0140631	0.0245138	0.0210171	0.0218011	0.0150559	0.0130626	0.00511635	0.0051003	0.00111439	0.000954972	0.00223084
31	1.55639	0.930148	0.665175	0.757619	0.589412	0.398143	0.264364	0.131285	0.199836	0.0845866	0.0505405	0.0755814	0.0361313	0.0478422	0.0396919	0.0408533	0.0438029	0.0592532	0.0204372	0.0100533	0.0175887	0.00838352	0.00765753	0.00645047	0.00453358	0.00351119	0.00466916	0.00821677	0.000964826	0.000299654
32	0.730683	0.909023	0.627169	0.714516	0.623731	0.305522	0.194961	0.268452	0.162448	0.126184	0.0889423	0.0660376	0.0794307	0.0588968	0.0281337	0.0303667	0.0202195	0.0344017	0.02345	0.0159459	0.0273408	0.0123615	0.00459907	0.00358158	0.00521841	0.00510283	0.000897146	0.00111686	0.000930773	0.00160116
33	0.874912	0.800478	0.642261	0.893914	0.472167	0.359247	0.265279	0.146138	0.124792	0.0928475	0.107214	0.0909921	0.0560682	0.0318122	0.0425607	0.0609042	0.0178403	0.0253554	0.0329951	0.0119785	0.026908	0.0036399	0.00614269	0.00314158	0.0031662	0.00293656	0.000890131	0.00225472	0.00143742
34	0.696611	0.724575	0.589681	0.75469	0.429515	0.281182	0.323543	0.207867	0.0923226	0.0712251	0.0430113	0.0705368	0.0239626	0.0256471	0.0223431	0.0255797	0.0102538	0.0084809	0.0111829	0.00924258	0.0154317	0.00946574	0.00556057	0.00292975	0.00347612	0.00200747	0.00065021	0.00389491
35	0.566575	0.643494	1.30957	0.75407	0.260185	0.375172	0.238701	0.229761	0.249055	0.0886387	0.0785352	0.0561473	0.0511336	0.0592351	0.0110107	0.0106745	0.0207374	0.020021	0.0189966	0.00567905	0.0133643	0.00485382	0.00484012	0.00179144	0.00423471	0.00224282	0.00202801
36	0.725534	0.765351	1.8035	0.578523	0.950894	0.526464	0.159593	0.21042	0.146099	0.0371265	0.0915519	0.0404424	0.061627	0.0869357	0.0346205	0.0167392	0.00911374		0.0241264		0.0036172	0.00156877	0.00024198	0.00411596	0.0122339	0.000563246
37	1.24082	0.664196	0.553288	0.261429	0.357786	0.213543	0.0943783	0.104213	0.0601883	0.0299108	0.0179001	0.0146707	0.0145917	0.0300324	0.0581441	0.0590074	0.0193674	0.0395833	0.0458364	0.0104359	0.0209296	0.0243766	0.0150589	0.0159214	0.0174164	0.0116439	0.00709436	0.00654206	0.00482943	0.00562294
38	1.2002	0.860379	0.313747	0.42004	0.469273	0.319576	0.118323	0.059938	0.0942728	0.0247479	0.0192755	0.0160903	0.0127939	0.0823839	0.054844	0.0217888	0.00853961	0.0521109	0.0264603	0.00579252	0.00815298	0.0148657	0.0177001	0.0117973	0.0082807	0.0168105	0.0159643	0.00292729	0.00303863	0.0125246
39	1.14822	1.14775	0.460815	0.369991	0.282316	0.287243	0.112503	0.0942321	0.0666267	0.0299054	0.00814404	0.0252442	0.0116285	0.0370214	0.0371746	0.0292114	0.0614203	0.0193754	0.00961206	0.0148579	0.0328235	0.0244926	0.022757	0.00921012	0.00617647	0.0132133	0.0102725	0.00995338	0.00623539	0.00840355
40	0.948226	1.21394	0.647623	0.803849	0.358992	0.208168	0.118559	0.0959407	0.114786	0.0639925	0.0192133	0.0241218	0.0230522	0.0458004	0.00954286	0.0351791	0.0305537	0.0152156	0.0189017	0.0216595	0.0182735	0.00614999	0.0115953	0.0143183	0.0129537	0.0113642	0.0151786	0.0052658	0.00940695	0.00219097
41	1.53743	0.840094	0.85071	0.535593	0.328006	0.164777	0.121684	0.108084	0.062776	0.0416569	0.0263745	0.0164165	0.0385714	0.0490971	0.0361189	0.0349475	0.0391298	0.0162939	0.0322835	0.00755003	0.00924121	0.0119639	0.00561305	0.00785111	0.00348653	0.0111283	0.00715984	0.00493276	0.00507182	0.00434459
42	0.871503	0.70775	0.717611	0.412622	0.280268	0.156563	0.144221	0.161059	0.122441	0.0324547	0.0432996	0.0250368	0.0130024	0.0842812	0.043027	0.0323604	0.0267023	0.0478725	0.0298132	0.026773	0.0142122	0.0205114	0.022972	0.0107303	0.00637058	0.00695085	0.00411299	0.00795924	0.00676645	0.00257147
43	0.953282	0.958037	0.688777	0.602461	0.336844	0.189284	0.205275	0.127968	0.055821	0.0357686	0.0356977	0.0357819	0.0241908	0.0683026	0.0394171	0.0413649	0.0341198	0.0267766	0.0206925	0.037145	0.028916	0.015262	0.0198004	0.0116437	0.0151573	0.0139647	0.0111758	0.00872074	0.00605301	0.00406776
44	1.2009	1.20134	0.522573	0.394833	0.321423	0.16839	0.0713163	0.0847867	0.0875116	0.0714802	0.0254042	0.0202319	0.016754	0.0278194	0.0207628	0.0439015	0.0396955	0.044181	0.0103993	0.0505645	0.018736	0.0177353	0.00919943	0.0156746	0.0160793	0.012959	0.018424	0.00635226	0.0029964	0.00352495
45	1.18586	1.07927	0.552614	0.626726	0.28842	0.222355	0.136592	0.140881	0.0982423	0.0618111	0.0346642	0.0411108	0.0232962	0.073154	0.0468311	0.032815	0.0277569	0.0290249	0.0193122	0.0262015	0.0262317	0.0268329	0.0166768	0.0165087	0.0147816	0.00939591	0.00384898	0.00390941	0.0021476	0.00068459
46	0.981253	1.18317	0.707293	0.594786	0.253223	0.257827	0.121504	0.0795678	0.0542764	0.0932655	0.0576878	0.0629124	0.0249109	0.053311	0.0648682	0.025993	0.0269553	0.0530713	0.0265311	0.0350863	0.0249099	0.0204067	0.012104	0.0125051	0.00794584	0.00477662	0.00310892	0.00163294	0.00171653	0.000454408
47	1.14701	1.12052	0.706399	0.507745	0.294014	0.249386	0.0861688	0.0432987	0.0498772	0.0507511	0.0176774	0.0267181	0.0252122	0.0349451	0.055236	0.036745	0.0230815	0.0229858	0.0124201	0.0153648	0.0261549	0.0180365	0.00640916	0.0115912	0.00679162	0.0059225	0.00244868	0.00149614	0.00250908	0.00232461
48	0.875923	0.712494	0.496466	0.307014	0.14531	0.133353	0.0811882	0.0616065	0.0309386	0.0602277	0.059767	0.0349596	0.0223187	0.0204532	0.0157151	0.0399567	0.0405017	0.0124402	0.0368119	0.0169473	0.00996419	0.00338032	0.0128152	0.00192106	0.00332587	0.00412631	0.00225691	0.00440558	0.00216419	0.00163876
49	1.20867	0.924625	0.64771	0.274396	0.143788	0.0899811	0.0876674	0.0404635	0.0469576	0.0224885	0.0694739	0.0340585	0.0184761	0.0405551	0.0424407	0.022558	0.00846932	0.0100756	0.0121158	0.0176478	0.00838703	0.00261627	0.00754411	0.00403363	0.00537026	0.00325848	0.00290099	0.000444869	0.00232437	7.50262e-05
50	0.611177	0.667802	0.921318	0.387403	0.124171	0.133687	0.0877763	0.108476	0.0272303	0.0355719	0.0442908	0.0580702	0.0266062	0.0277166	0.00515388	0.00809917	0.0021864	0.00978618	0.0133014	0.0118908	0.0160054	0.00422247	0.00565753	0.00401146	0.00143382	0.00403687	0.0176491	0.00319094	0.0014709	0.000120984
51	0.633126	0.642062	0.663714	0.306035	0.16776	0.12262	0.0847468	0.0791389	0.0430372	0.065406	0.0112666	0.0144743	0.0110563	0.0152623	0.0111312	0.0156262	0.0140259	0.00928051	0.00529066	0.00507809	0.00575798	0.0112392	0.00206293	0.00270432	0.00331878	0.000193046	0.000615129	8.39014e-05		7.22914e-05
52	0.641241	0.637211	0.651795	0.349762	0.263914	0.115539	0.0866872	0.0871751	0.0443003	0.0443777	0.0300135	0.0144021	0.0130938	0.0385175	0.00804623	0.0100521	0.00541839	0.00412972	0.00261281	0.00216739	0.0121867	0.00825869	0.00415912	0.0131862	0.00273771		0.00222369	0.0011503	0.000140319	0.000634413
53	0.576851	1.25724	0.382805	0.212155	0.145589	0.230174	0.0845614	0.114888	0.0448054	0.036217	0.0377042	0.0224513	0.0126609	0.0145551	0.0174359	0.0134825	0.0109019	0.016066	0.00265558	0.0045182	0.00133391	0.00189462	0.00269899	0.00447566	0.0137254	0.00249695		0.000508755	0.00366479	0.00236265
54	1.64361	0.820057	0.455558		0.167947	0.173104	0.272415	0.104861	0.0427627	0.0699294	0.0275214	0.0188641	0.0118982	0.0162975	0.0187366		0.0247586	0.00659049	0.00509053		0.000636381	0.000890675	0.00407951				0.000241888			0.000771062
55	1.16954	0.690671	1.24109	0.501129	0.373224	0.396087	0.168385	0.29849	0.238688	0.219413	0.129184	0.0837326	0.0684609	0.113816	0.0630751	0.0476568	0.0179959	0.00764544	0.00830538	0.0144413	0.00429802	0.0139815	0.00776302	0.00165792	0.00274456	0.00181829	0.00260874	0.00426059	0.00200472	0
56	1.52107	1.7731	0.581531	0.675804	0.339059	0.34574	0.200392	0.271843	0.342592	0.158543	0.327283	0.154575	0.0998368	0.0671338	0.0417077	0.0281022	0.0196691	0.0153886	0.00436968	0.00662872	0.0177994	0.00682386	0.00485124	0.00347726	0.00160865	0.00260467	0.00246347	0.00656013	0.00188401	0.00193231
57	0.942063	1.17071	0.834586	0.489892	0.421595	0.354365	0.282371	0.398534	0.234445	0.202763	0.133828	0.13285	0.0836243	0.0664176	0.0449947	0.03551	0.0191839	0.0230588	0.0101352	0.00707297	0.0151359	0.00428219	0.00337431	0.00135159	0.00658586	0.00485946	0.0015496	0.00173885	0.000698344	0.000482238
58	1.07198	0.79576	0.586318	0.431508	0.326005	0.489947	0.300285	0.315905	0.206487	0.143086	0.180058	0.0801103	0.0810606	0.0921372	0.0971396	0.0258882	0.0216565	0.00779597	0.00445389	0.0249887	0.00785209	0.0137946	0.0119089	0.0019415	0.00375576	0.0022131	0.00368196	0.000703978	0.00176699	0.000545261
59	1.09567	1.0559	1.138	0.444731	0.383512	0.193075	0.27918	0.216682	0.163602	0.151045	0.0478412	0.0974761	0.0581148	0.19839	0.199739	0.112487	0.0318225	0.0192458	0.00787151	0.0210499	0.00726641	0.00129737	0.0151823	0.00351297	0.0374739	0.00969062	0.00403433	0.000654623	0.00290468	0.00344404
60	0.868076	0.88765	0.978123	0.486369	0.579372	0.676852	0.443163	0.36262	0.201831	0.328982	0.204824	0.303748	0.296368	0.083785	0.0312953	0.0211536	0.0587331	0.0199224	0.00885565	0.01139	0.0428211	0.0144026	0.00786899	0.00334769	0.00411467	0.00372089	0.000607995	0.000596265	0.00088878	0.00232813
61	2.25812	0.580189	0.993479	0.554855	0.530794	0.622843	0.488698	0.619871	0.215865	0.483939	0.35372	0.221159	0.0797983	0.0821346	0.0559077	0.0555681	0.0234009	0.0503345	0.018914	0.0367901	0.0117614	0.0262411	0.0108334	0.00298801	0.00125017	0.00130012	0.00588506	0.00067721	0.00190298	0
62	0.679504	0.825314	1.92331	0.463291	0.390179	0.402044	0.238935	0.280075	0.406047	0.199178	0.269193	0.15603	0.069986	0.0423351	0.0540508	0.0392797	0.0195319	0.0374584	0.0386409	0.0201458	0.00718341	0.00616339	0.00545554	0.00240758	0.0112275	0.0224189	0.00100911	0.000350412	0.00106138	0.000281202
63	0.620634	1.28525	0.542936	0.503789	0.515761	0.231367	0.21448	0.358656	0.25532	0.179425	0.106146	0.0694992	0.0897119	0.0685328	0.0384954	0.0224461	0.0414209	0.0297189	0.015395	0.0155646	0.009551	0.00490011	0.00924256	0.00239952	0.000718035	0.000262584	0.000155114	0.000114082	0.000121473	0.000663329
64	0.660601	1.13794	0.866352	0.648364	0.415065	0.440643	0.289386	0.390732	0.268048	0.18653	0.162673	0.0887153	0.112609	0.0582742	0.176652	0.0862332	0.0462043	0.0151149	0.0224677	0.0259231	0.00676676	0.00244023	0.00348169	0.00110323	0.00573047	0.00052127	0.00449543	0.000358176	0.000141174	0
65	0.556305	1.24693	0.648834	0.548528	0.644983	0.584269	0.524008	0.133971	0.112674	0.237737	0.0981438	0.130494	0.113458	0.0432033	0.0287163	0.0204002	0.0209116	0.0139717	0.00738606	0.00513307	0.00814572	0.00422598	0.00427855	0.00696633	0.00197535	0.000221327	0.00122683	0.000865098	3.34043e-05	0.000221103
66	0.994193	1.01187	0.894554	0.608357	0.308582	0.186005	0.125752	0.165198	0.109916	0.153718	0.105426	0.203657	0.0676664	0.0648585	0.0742115	0.129955	0.0169548	0.0226154	0.0130467	0.0130661	0.00769047	0.00957424	0.0092347	0.00201262	0.00164372	0.0024446	0.00105728	0.00014436	0.00100198	0.000228146
67	1.24641	0.606295	0.760604	0.868448	0.268994	0.130269	0.239684	0.133607	0.135729	0.046014	0.0950307	0.0533325	0.0694807	0.0239125	0.0436258	0.0623254	0.0450226	0.0308317	0.0495609	0.0183625	0.008538	0.00621909	0.0423157	0.0057248	0.00894792	0.00362249	0.018665	0.00107257	0	0.000788845
68	0.912964	0.753314	0.517834	0.429046	0.325878	0.111454	0.106304	0.220742	0.206315	0.11129	0.0805279	0.0694211	0.0447192	0.031336	0.0413433	0.0555771	0.0711212	0.104909	0.0488913	0.00698083	0.00841281	0.0200451	0.0188027	0.00245972	0.00082345	0.00312248	0.000357208	0.000169945	0.000584094
69	0.757468	0.625832	0.953383	0.646794	0.361454	0.543767	0.179205	0.32345	0.135688	0.038838	0.194045	0.0735089	0.0630523	0.017553	0.0155131	0.0275522	0.032361	0.00469024	0.0105841	0.0254431	0.0196868	0.0303811	0.00659416	0.00389237	0.000936317	0.00177385	0.000233854	0
70	0.808018	0.639632	0.394559	0.301458	0.762721	0.148515	0.354481	0.334741	0.124111	0.0540711	0.072765	0.0892371	0.128883	0.0478359	0.0135555	0.00625789	0.0489378	0.00996398	0.00669154	0.019407	0.0142758	0.00139364	0.00210137	0.000755032	0.00885585	0.00287468
71	1.49197	0.315538	0.141707	0.431246	1.50042	0.939698	0.659269	0.254873	0.606515	0.125463	0.0364512	0.0872244	0.0193448	0.112929	0.0195739	0.00584772	0.0146918	0.00481797	0.00124159	0.00160687	0.00347018	0.00153911	0.00180603	0.00285593	0.000699012
72	0.491496	0.976576	0.675751	1.31776	1.22279	0.646869	0.549326	0.328569	0.272021	0.0548729		0.0195527			0.00594736			0.00607381	0.00554368	0.00236861	0.000552561	0.00244369	0.0144279	0.00428926
73	1.49887	0.420343	0.786682	0.825628	0.304645	0.288661	0.158376	0.0673593	0.0950919	0.0560128	0.0496801	0.0230849	0.01838	0.0128525	0.0350815	0.021123	0.0171559	0.0120361	0.0157864	0.0205645	0.0174578	0.00800887	0.00963367	0.010986	0.00441827	0.00326901	0.00725001	0.00660866	0.00121596	0.00293168
74	1.36157	1.11724	0.628661	0.895563	0.373046	0.314342	0.162823	0.11384	0.0732259	0.0808534	0.070149	0.0512488	0.0175484	0.0110632	0.0392241	0.022184	0.0317371	0.0229584	0.0235478	0.0271143	0.0265152	0.0092126	0.00731406	0.00456678	0.00497146	0.00535084	0.00301648	0.00123472	0.0013428	0.00220932
75	1.16328	0.849311	0.629946	0.621938	0.641713	0.342443	0.196289	0.117065	0.122626	0.0545804	0.0405888	0.0251738	0.0095651	0.00987619	0.0286025	0.0581565	0.0196314	0.0199846	0.0167248	0.0164736	0.0129363	0.00909175	0.00713075	0.0107704	0.00211549	0.0020576	0.00323677	0.00275582	0.00419322	0.000218144
76	1.17231	1.03405	0.657898	0.681505	0.250426	0.264025	0.124473	0.187131	0.127639	0.033582	0.0338026	0.0200078	0.0190922	0.0195403	0.0367348	0.0274949	0.0215969	0.00925503	0.0172485	0.0142712	0.00949847	0.00552223	0.00992322	0.00596615	0.00329961	0.00255459	0.001538	0.00200224	0.00540839	0.000368845
77	0.869553	0.926347	0.784011	0.621244	0.611447	0.326312	0.14922	0.157568	0.0696879	0.0841606	0.0305332	0.0211172	0.015447	0.00816631	0.0222369	0.0181398	0.0118856	0.0285922	0.00764761	0.00775789	0.0148727	0.00801956	0.00665724	0.00533491	0.00478733	0.00166385	0.00211944	0.0021731	0.000461304	0.000149951
78	1.25928	0.92782	1.00643	0.683338	0.561037	0.204193	0.101375	0.143776	0.0880732	0.0571541	0.0638749	0.0450499	0.0219407	0.00794935	0.0247871	0.0140563	0.014369	0.0110742	0.0080622	0.014294	0.008844	0.00422477	0.00260428	0.00419085	0.00262618	0.00257865	0.00188741	0.000846365	0.00112424	0.000398339
79	0.974556	0.83337	0.693758	0.49047	0.282652	0.297662	0.141019	0.043004	0.0704685	0.0804879	0.0448064	0.0308237	0.0210147	0.0197988	0.0340424	0.0195206	0.0145239	0.0202396	0.0109141	0.0152579	0.00750736	0.00820541	0.00422297	0.00240157	0.00196818	0.00683423	0.00113941	0.000901627	0.00102228	0.000264886
80	0.949598	0.798926	0.604774	0.535113	0.310296	0.174646	0.143909	0.124703	0.11293	0.101951	0.0384622	0.0432522	0.0109768	0.00844886	0.0131156	0.0097871	0.00861068	0.0113873	0.00723664	0.0111556	0.0137111	0.00697102	0.0100134	0.0128042	0.00252516	0.00388187	6.8797e-05	0.00124674	0.00102265	0.000118423
81	1.10768	0.980972	0.694048	0.487496	0.247177	0.200134	0.098689	0.0945929	0.136154	0.038959	0.0230326	0.019983	0.00696994	0.012877	0.00810255	0.00634833	0.0104993	0.0161726	0.0216894	0.0108848	0.00433436	0.00447294	0.00281404	0.00947529	0.00250225	0.00170327	0.000197207	0.00141257	0.00087944	0.000202241
82	1.11408	1.11504	0.694129	0.503265	0.288912	0.333037	0.122887	0.128375	0.0474035	0.0281788	0.0243616	0.0107587	0.0176001	0.00985307	0.00789758	0.0108841	0.00554359	0.00822738	0.00665127	0.00355535	0.00364159	0.00469808	0.00786969	0.0034027	0.00189328	0.000711743	0.00205255	0.000134472	0.000159057	0
83	1.02894	0.777876	0.781859	0.635583	0.31957	0.111797	0.0745331	0.0390028	0.0235326	0.0282975	0.0204002	0.0254057	0.0121869	0.00815445	0.0140671	0.0142249	0.00481408	0.00146668	0.00415304	0.00220873	0.00289521	0.00164784	0.00169678	0.000478443	0.000286756	0.000267731	0.000133103	0.00010959	0.000754335	0
84	0.884889	0.89887	0.836062	0.390334	0.225703	0.172331	0.069322	0.0275431	0.0358139	0.0130819	0.0142831	0.00860583	0.00515109	0.00775728	0.0100787	0.00527777	0.00328196	0.0044865	0.00608988	0.00293216	0.00160192	0.0011559	0.000626487	0.000662516	0.000987404	0.000249936	0.000323857	3.37604e-06	4.28041e-05	0
85	1.06154	1.0943	0.351135	0.457158	0.309887	0.151465	0.115268	0.0271198	0.0114376	0.0131946	0.00966437	0.0115412	0.00501731	0.00787927	0.00806487	0.00416502	0.00479933	0.00217637	0.00335046	0.00166645	0.0032029	0.000467923	0.000784258	0.000687079	0.000879737	0.000185267	0.000944985	0.000104603	7.42146e-06	3.8175e-06
86	0.633452	0.575965	0.415763	0.327321	0.314922	0.106308	0.0611215	0.044665	0.0245853	0.0207271	0.0091061	0.0120919	0.00765875	0.00655892	0.00428181	0.00565423	0.000962398	0.00349745	0.000731044	0.00027991	0.00055096	0.00256455	2.0658e-05	0.000191935	4.46407e-05	0.000104331	1.45511e-05	0.000365807	0	5.60946e-05
87	1.14456	0.565406	0.468695	0.495496	0.108164	0.107543	0.113115	0.0488052	0.0136851	0.045323	0.0137976	0.0125873	0.00464591	0.00542227	0.00242453	0.00668201	0.0018067	0.000649235	0.000664606	0.000532349	0.000776711	0.00022132	0.00071923	2.35367e-05	0.000427073	6.62174e-05	4.44665e-05	0	0	0
88	0.860163	0.689283	0.237264	0.153122	0.170595	0.124924	0.0510428	0.0408546	0.0367458	0.0189955	0.00815693	0.00881843	0.00525695	0.0063267	0.00190317	0.00281731	0.00128511	0.000907557	0.00251912	0.000275669	0.000104093	0.000638988	0.000189714	0.000230105	0	4.80499e-05	9.27184e-05	0	0
89	0.698576	0.822037	0.321413	0.318649	0.341172	0.146348	0.0751336	0.0682681	0.0154932	0.0462137	0.0302242	0.00721087	0.00600915	0.00545876	0.00363187	0.000356654	0.000318323	0.000282815	0.000337664	0.000239598	0.000188474	1.96281e-05	4.92446e-05	0	0	0	0
90	0.198217	0.683173	0.557907	0.333741	0.340212	0.0795855	0.0161371	0.0207814	0.0403166	0.00484015	0.0165089	0.00383059	0.00303449	0.000365619	0.00240477	0.000275306	0.000851776	4.86498e-05	0.000740119		0	0.000142767		0	0

## Sheet: Mean_SEM
Position	0	0.0344828	0.0689655	0.103448	0.137931	0.172414	0.206897	0.241379	0.275862	0.310345	0.344828	0.37931	0.413793	0.448276	0.482759	0.517241	0.551724	0.586207	0.62069	0.655172	0.689655	0.724138	0.758621	0.793103	0.827586	0.862069	0.896552	0.931034	0.965517	1
Control-Mean	1	0.838301	0.68497	0.596447	0.484731	0.401248	0.283389	0.21369	0.161915	0.126444	0.100495	0.0865366	0.0701197	0.063636	0.0529077	0.0499074	0.0485309	0.0400481	0.0390777	0.0320913	0.030479	0.0269296	0.0252777	0.0227054	0.0221577	0.0192152	0.0167534	0.0162681	0.0123545	0.0110035
Control-SEM	0	0.0141373	0.035712	0.0731213	0.0671494	0.0791006	0.054076	0.0367484	0.0213456	0.0150055	0.0123985	0.0157232	0.0129924	0.0119821	0.0119593	0.0144099	0.0173836	0.0135903	0.0138913	0.0103981	0.00997414	0.00885862	0.00773544	0.00766914	0.0078596	0.00667543	0.00585288	0.00628635	0.00444467	0.00411222
myr-Garz-DN-Mean	1	0.951489	0.73087	0.589357	0.406466	0.287164	0.200574	0.157225	0.127355	0.0963756	0.0731582	0.0608437	0.0464264	0.0394323	0.033975	0.0315784	0.021984	0.0176261	0.0151055	0.0160191	0.014462	0.00879503	0.00813032	0.00626019	0.00528347	0.00382947	0.00345532	0.00283237	0.00243776	0.00161412
myr-Garz-DN-SEM	0	0.0500901	0.0523875	0.0584311	0.0465132	0.0406762	0.0374614	0.0345696	0.0290248	0.023798	0.0224461	0.0172754	0.0145533	0.0104975	0.00971404	0.0101689	0.00758686	0.00534228	0.00539367	0.00669866	0.00672409	0.00333629	0.00305219	0.00273871	0.00206177	0.00149552	0.00132304	0.00134599	0.00116295	0.000788063
