# Supplementary material for: Cellular compartmentalisation and receptor promiscuity as a strategy for accurate and robust inference of position during morphogenesis
Source: eLife. 2023 Mar 6;12:e79257. doi: 10.7554/eLife.79257 (PMC9988261; doi:10.7554/eLife.79257)
Supplement: Figure 14—source data 1. [file elife-79257-fig14-data1.xlsx]

## Sheet: CAAX-GFP
	Disc 1	Disc 2	Disc 3	Disc 4
Position	CV	CV	CV	CV
0	0.0959961	0.0738691	0.0454143	0.0768878
0.0344828	0.0953	0.0788227	0.0413368	0.0551646
0.0689655	0.108165	0.0669553	0.0415244	0.0356923
0.103448	0.111881	0.0693047	0.0826204	0.0543024
0.137931	0.113064	0.0560282	0.0707913	0.0446063
0.172414	0.080673	0.0526182	0.0454386	0.0650286
0.206897	0.12361	0.0669558	0.0460848	0.0578517
0.241379	0.0997465	0.0822288	0.0510419	0.0578287
0.275862	0.0697115	0.0914514	0.0773975	0.0649767
0.310345	0.0666135	0.0649506	0.0665342	0.0590869
0.344828	0.0872126	0.100692	0.0784037	0.0695974
0.37931	0.11298	0.0787983	0.0888482	0.0504566
0.413793	0.0763989	0.101778	0.0677255	0.0636527
0.448276	0.115641	0.0654898	0.085269	0.0482546
0.482759	0.107834	0.0672195	0.0564142	0.0871831
0.517241	0.0946718	0.0628369	0.0726569	0.0946157
0.551724	0.0917192	0.128562	0.106306	0.0927453
0.586207	0.0813719	0.115018	0.121831	0.0844028
0.62069	0.0557021	0.129164	0.128338	0.12389
0.655172	0.0666936	0.108986	0.137668	0.110943
0.689655	0.0972327	0.0877627	0.107626	0.102683
0.724138	0.0826516	0.0607392	0.110556	0.107864
0.758621	0.100205	0.129783	0.0867692	0.132772
0.793103	0.192301	0.111612	0.0880275	0.123258
0.827586	0.145814	0.0979278	0.0754626	0.0846535
0.862069	0.126755	0.139617	0.0897226	0.103432
0.896552	0.135444	0.102706	0.0736297	0.143012
0.931034	0.114967	0.127921	0.0853319	0.179388
0.965517	0.0832826	0.165507	0.0653659	0.192415
1	NaN	0.193436	0.0575846	0.187756

## Sheet: w1118_Wg-Endo
Disc 1				Disc 2				Disc 3				Disc 4
Mean	CV	SD	Position	Mean	CV	SD	Position	Mean	CV	SD	Position	Mean	CV	SD	Position		Average CV
61.5821	0.356768	22.2192	0	22.2414	0.216881	4.78756	0	64.5484	0.187157	12.3097	0	36.2761	0.193889	7.10905	0		0.238674
50.7518	0.305164	15.2608	0.0344828	19.1626	0.346046	6.46552	0.0344828	51.9832	0.255942	13.233	0.0344828	31.2759	0.249537	7.76467	0.0344828		0.289172
42.6933	0.168886	7.29032	0.0689655	13.3602	0.163817	2.09703	0.0689655	49.9717	0.232202	11.6443	0.0689655	24.3681	0.229542	5.64483	0.0689655		0.198612
43.8897	0.204696	9.16494	0.103448	9.39042	0.342504	3.22873	0.103448	46.5966	0.19787	9.37471	0.103448	19.1898	0.321128	6.28706	0.103448		0.266549
37.8633	0.306081	11.8936	0.137931	8.21631	0.34141	2.91099	0.137931	37.8484	0.231716	8.87704	0.137931	13.3608	0.295952	4.0539	0.137931		0.29379
35.1255	0.253164	8.91402	0.172414	6.06342	0.306388	1.91251	0.172414	32.38	0.185555	5.96314	0.172414	9.4445	0.323484	3.15712	0.172414		0.267148
24.3093	0.198994	4.85591	0.206897	4.16169	0.386884	1.61063	0.206897	23.0708	0.179961	4.16754	0.206897	7.04758	0.332019	2.42849	0.206897		0.274464
18.5744	0.245645	4.64789	0.241379	3.23358	0.26653	0.88358	0.241379	15.9044	0.208816	3.31728	0.241379	5.85346	0.424605	2.62294	0.241379		0.286399
13.3331	0.363398	5.07452	0.275862	2.65933	0.319545	0.873464	0.275862	11.1915	0.220358	2.49161	0.275862	5.01348	0.221118	1.1463	0.275862		0.281105
9.82352	0.236582	2.39013	0.310345	2.0967	0.326668	0.688413	0.310345	9.22469	0.179096	1.64034	0.310345	3.95679	0.423081	1.76064	0.310345		0.291357
7.88555	0.279162	2.20381	0.344828	1.59966	0.289134	0.467417	0.344828	7.26759	0.305928	2.14336	0.344828	3.24367	0.478788	1.6026	0.344828		0.338253
7.81155	0.295469	2.33499	0.37931	1.2493	0.295551	0.360482	0.37931	6.14289	0.299144	1.82259	0.37931	2.46537	0.469443	1.15641	0.37931		0.339902
6.50821	0.313647	2.08235	0.413793	1.08417	0.345259	0.362655	0.413793	4.71901	0.291545	1.33596	0.413793	1.9205	0.405175	0.768712	0.413793		0.338906
5.53138	0.378947	2.13541	0.448276	0.873186	0.416757	0.362473	0.448276	5.0081	0.306896	1.50228	0.448276	1.73678	0.386343	0.674824	0.448276		0.372236
4.29634	0.357249	1.51143	0.482759	0.62897	0.287356	0.17203	0.482759	4.95309	0.285881	1.40749	0.482759	1.3368	0.342953	0.452217	0.482759		0.31836
4.18497	0.396389	1.68105	0.517241	0.506445	0.291536	0.149403	0.517241	5.2153	0.459441	2.28083	0.517241	1.01953	0.301694	0.308684	0.517241		0.362265
3.67455	0.320246	1.19777	0.551724	0.442113	0.301028	0.134157	0.551724	5.99267	0.491415	3.04337	0.551724	0.788515	0.227431	0.178604	0.551724		0.33503
3.13203	0.285897	0.898552	0.586207	0.421274	0.427554	0.172193	0.586207	4.74358	0.355172	1.73157	0.586207	0.61318	0.289756	0.17247	0.586207		0.339595
3.49525	0.328065	1.15454	0.62069	0.400766	0.426152	0.177058	0.62069	4.43065	0.351134	1.59613	0.62069	0.467728	0.389654	0.179422	0.62069		0.373751
2.72269	0.27292	0.734035	0.655172	0.402222	0.484042	0.220125	0.655172	3.541	0.315855	1.16424	0.655172	0.406672	0.382249	0.153583	0.655172		0.363767
2.5719	0.397692	1.01795	0.689655	0.343398	0.470506	0.182857	0.689655	3.40605	0.488978	1.68926	0.689655	0.433328	0.429951	0.193456	0.689655		0.446782
1.94636	0.490064	0.952742	0.724138	0.301069	0.440309	0.13889	0.724138	3.2293	0.395734	1.31795	0.724138	0.455147	0.614648	0.309802	0.724138		0.485189
2.0895	0.471154	0.977405	0.758621	0.30656	0.54899	0.183328	0.758621	2.75109	0.40002	1.10934	0.758621	0.390935	0.434009	0.183538	0.758621		0.463543
2.36087	0.2873	0.662064	0.793103	0.221314	0.354783	0.0819864	0.793103	2.15618	0.346025	0.740178	0.793103	0.331198	0.387389	0.128579	0.793103		0.343874
2.43787	0.468686	1.08469	0.827586	0.187847	0.418761	0.0795928	0.827586	2.02111	0.471428	0.937521	0.827586	0.336865	0.312161	0.109144	0.827586		0.417759
1.94531	0.402975	0.772036	0.862069	0.160041	0.552251	0.0945752	0.862069	1.93168	0.378144	0.7644	0.862069	0.295654	0.477157	0.144575	0.862069		0.452632
1.58627	0.396583	0.647317	0.896552	0.140191	0.61326	0.086656	0.896552	1.80461	0.415726	0.798892	0.896552	0.253723	0.421658	0.100395	0.896552		0.461806
1.66158	0.446482	0.703364	0.931034	0.0968553	0.706353	0.0765109	0.931034	1.76084	0.268822	0.515062	0.931034	0.234225	0.51367	0.117935	0.931034		0.483832
1.21747	0.503209	0.646309	0.965517	0.0971203	0.53828	0.0535241	0.965517	1.31196	0.283316	0.403529	0.965517	0.179788	0.650051	0.111311	0.965517		0.493714
1.04384	0.6037	0.610002	1	0.0879385	0.394012	0.0331095	1	1.24008	0.404641	0.512332	1	0.141404	0.44079	0.0591041	1		0.460786

## Sheet: myrGarzDN_Wg-Endo
Disc 1				Disc 2				Disc 3				Disc 4				Disc 5
Mean	CV	SD	Position	Mean	CV	SD	Position	Mean	CV	SD	Position	Mean	CV	SD	Position	Mean	CV	SD	Position		Average CV
16.7205	0.368762	6.27143	0	47.9351	0.269747	13.0042	0	45.5758	0.294334	13.8656	0	19.9753	0.426337	8.58532	0	34.1874	0.294805	10.068	0		0.330797
18.8622	0.350991	6.57772	0.0344828	47.1884	0.204051	9.68429	0.0344828	41.259	0.243531	10.2592	0.0344828	18.0726	0.372874	6.7773	0.0344828	28.5435	0.236114	6.77624	0.0344828		0.281512
13.6371	0.296709	4.09081	0.0689655	41.2286	0.356317	15.0186	0.0689655	28.3834	0.255912	7.08929	0.0689655	15.197	0.475152	7.73698	0.0689655	20.3449	0.320841	6.79478	0.0689655		0.340986
11.1344	0.341648	3.78691	0.103448	36.7571	0.199222	7.33094	0.103448	19.7095	0.36324	7.174	0.103448	11.368	0.389557	4.47497	0.103448	17.5213	0.355024	6.3768	0.103448		0.329738
8.01579	0.47543	3.91725	0.137931	23.453	0.310954	7.47949	0.137931	12.068	0.363963	4.35805	0.137931	9.45518	0.613466	6.58347	0.137931	11.1292	0.421662	4.80644	0.137931		0.437095
5.03873	0.404404	2.0557	0.172414	18.7572	0.20347	3.83035	0.172414	8.43197	0.328624	2.85864	0.172414	7.08796	0.550461	4.54718	0.172414	6.95098	0.434897	3.094	0.172414		0.384371
4.1517	0.54183	2.25674	0.206897	13.0256	0.279345	3.58958	0.206897	5.03754	0.426369	2.28388	0.206897	5.27867	0.50281	3.14889	0.206897	3.69371	0.41738	1.56543	0.206897		0.433547
2.46022	0.538728	1.35515	0.241379	9.41008	0.24639	2.32192	0.241379	4.2333	0.336733	1.44651	0.241379	5.36254	0.378872	2.27402	0.241379	2.78065	0.617083	1.75154	0.241379		0.423561
2.16304	0.581532	1.28012	0.275862	8.20481	0.259648	2.1253	0.275862	2.9289	0.440669	1.27962	0.275862	4.18405	0.517955	2.43477	0.275862	2.13737	0.660469	1.43621	0.275862		0.492054
1.63929	0.618611	1.02959	0.310345	5.57319	0.375953	2.11795	0.310345	2.20453	0.406747	0.895957	0.310345	3.47413	0.633854	2.16293	0.310345	1.54802	0.624684	0.956993	0.310345		0.53197
0.90411	0.843296	0.773927	0.344828	4.99153	0.39925	2.01163	0.344828	1.4263	0.526812	0.780824	0.344828	2.90399	0.606697	1.85145	0.344828	1.05688	0.611717	0.629055	0.344828		0.597555
0.964149	0.748847	0.709298	0.37931	3.89281	0.262919	1.01798	0.37931	1.23867	0.508599	0.651115	0.37931	2.30346	0.590782	1.38618	0.37931	0.781254	0.654864	0.473374	0.37931		0.553202
0.671781	0.68785	0.452439	0.413793	3.54436	0.406696	1.46693	0.413793	0.870526	0.386722	0.336949	0.413793	1.71843	0.650679	1.18214	0.413793	0.440547	0.558144	0.219962	0.413793		0.538018
0.373254	0.922771	0.335284	0.448276	2.79855	0.381472	1.08614	0.448276	1.83099	0.530037	1.01929	0.448276	1.31765	0.601709	0.858734	0.448276	0.352747	0.50532	0.161573	0.448276		0.588262
0.19967	0.900188	0.178459	0.482759	2.49609	0.376918	0.923237	0.482759	1.39138	0.596673	0.883237	0.482759	1.20684	0.903725	1.04857	0.482759	0.509941	0.80944	0.456109	0.482759		0.717389
0.141635	0.91606	0.124831	0.517241	2.85888	0.485036	1.33411	0.517241	1.22753	0.452329	0.610077	0.517241	1.00803	0.764112	0.702331	0.517241	0.423343	0.995723	0.4674	0.517241		0.722652
0.0486426	0.806265	0.0371455	0.551724	2.15669	0.505321	1.01235	0.551724	1.04169	0.615495	0.691294	0.551724	0.612545	0.518034	0.334553	0.551724	0.290517	0.911595	0.300696	0.551724		0.671342
0.0436595	1.13016	0.0462755	0.586207	1.5478	0.480306	0.729837	0.586207	0.999682	0.677472	0.745939	0.586207	0.456573	1.0089	0.474221	0.586207	0.288487	0.919684	0.302962	0.586207		0.843304
0.0408385	1.67872	0.0642106	0.62069	1.63261	0.33676	0.529369	0.62069	0.790182	0.679533	0.568031	0.62069	0.281278	0.949978	0.297666	0.62069	0.26007	0.870892	0.254885	0.62069		0.903177
0.0188373	1.88249	0.0339447	0.655172	1.93356	0.762826	1.45146	0.655172	0.783763	0.732132	0.60784	0.655172	0.287054	0.621	0.190455	0.655172	0.241521	0.938208	0.282002	0.655172		0.987331
0.0137495	0.908117	0.0120084	0.689655	1.89048	0.645656	1.18578	0.689655	0.734967	0.607247	0.434899	0.689655	0.196758	0.829948	0.185317	0.689655	0.207623	1.04273	0.254763	0.689655		0.806739
0.0156379	1.2435	0.0171118	0.724138	0.941331	0.607029	0.573115	0.724138	0.571422	0.659781	0.389467	0.724138	0.144944	0.921994	0.174092	0.724138	0.123359	0.817539	0.116901	0.724138		0.849968
0.00958799	1.53657	0.0150035	0.758621	0.863542	0.761418	0.662833	0.758621	0.509008	0.618742	0.311612	0.758621	0.148473	0.938907	0.187053	0.758621	0.118364	0.895512	0.13015	0.758621		0.95023
0.00585583	1.46175	0.00915329	0.793103	0.742176	0.855	0.658802	0.793103	0.425118	0.492375	0.221875	0.793103	0.0541182	0.5353	0.0315694	0.793103	0.117292	1.08559	0.14881	0.793103		0.886003
0.00963446	1.61149	0.0147213	0.827586	0.553698	0.685095	0.388045	0.827586	0.380001	0.622128	0.24243	0.827586	0.0862561	1.50991	0.175804	0.827586	0.05587	0.899519	0.057631	0.827586		1.06563
0.00213722	1.51745	0.0031641	0.862069	0.310685	0.872664	0.27167	0.862069	0.367583	0.593071	0.223403	0.862069	0.0586509	1.3646	0.108129	0.862069	0.0525359	1.09844	0.0696431	0.862069		1.08924
0.00207865	1.38627	0.00293044	0.896552	0.247412	0.779624	0.201017	0.896552	0.340041	0.848867	0.283734	0.896552	0.0658216	1.44265	0.0922754	0.896552	0.0422119	1.31107	0.0634359	0.896552		1.1537
0.00137526	1.77837	0.0023794	0.931034	0.34922	0.722188	0.257058	0.931034	0.207615	0.748893	0.13949	0.931034	0.0234377	1.48721	0.0361762	0.931034	0.0364317	1.34586	0.057226	0.931034		1.2165
0.00191808	1.74708	0.00280982	0.965517	0.299072	0.700028	0.201185	0.965517	0.183264	0.638617	0.11012	0.965517	0.0167859	0.838163	0.0179313	0.965517	0.0332837	1.39817	0.0526811	0.965517		1.06441
5.04391e-05	2.68343	0.000123317	1	0.174723	0.89306	0.148774	1	0.155325	1.12187	0.148816	1	0.0126736	1.2691	0.021284	1	0.0129938	1.90115	0.0299921	1		1.57372
